# Supplementary material for: In silicoprofiling nanoparticles: predictive nanomodeling using universal nanodescriptors and various machine learning approaches
Source: Royal Society of Chemistry journal article supplement (doi:10.1039/c9nr00844f), 2019-01-01
Supplement: c9nr00844f1.xlsx [file c9nr00844f1.xlsx]

## Sheet: Excel Table S1
Index	Size [nm]	#Ligand	Ligand SMILES	GNP-enzyme binding
GNP1	5	310	O=C(NC1=CC=C(CC(NC(CC2CCCC2)=O)C(NCCCC)=O)C=C1)CCCCC3SSCC3	1.60063
GNP2	5	310	O=C(NC1=CC=C(CC(NC(CC(CC)C)=O)C(NC2CCCCC2)=O)C=C1)CCCCC3SSCC3	1.16453
GNP3	5	310	O=C(NC1=CC=C(CC(NC(CC2CCCC2)=O)C(NCCC3=CC=C(OC)C(OC)=C3)=O)C=C1)CCCCC4SSCC4	0.818608
GNP4	5	310	O=C(NC1=CC=C(CC(NC(CC2CCCC2)=O)C(NCC3=CC=C(OCO4)C4=C3)=O)C=C1)CCCCC5SSCC5	1.7863
GNP5	5	310	O=C(NC1=CC=C(CC(NC(CC2CCCC2)=O)C(NC(C3=CC=C(O)C=C3)C(OC)=O)=O)C=C1)CCCCC4SSCC4	0.474018
GNP6	5	310	O=C(NC1=CC=C(CC(NC(CC2CCCC2)=O)C(O)=O)C=C1)CCCCC3SSCC3	8.40939
GNP7	5	310	O=C(NC1=CC=C(CC(NC(CC2CCCC2)=O)C(OC)=O)C=C1)CCCCC3SSCC3	1.77499
GNP8	5	310	O=C(NC1=CC=C(CC(NC(CC2CCCC2)=O)C(NC3C(O)C(O)C(CO)OC3O)=O)C=C1)CCCCC4SSCC4	9.2476
GNP9	5	310	O=C(NC1=CC=C(CC(NC(C2=CC=CC=C2)=O)C(NCCCC)=O)C=C1)CCCCC3SSCC3	0.644979
GNP10	5	310	O=C(NC1=CC=C(CC(NC(C2=CC=CC=C2)=O)C(NC3CCCCC3)=O)C=C1)CCCCC4SSCC4	0.978901
GNP11	5	310	O=C(NC1=CC=C(CC(NC(C2=CC=CC=C2)=O)C(NCCC3=CC(OC)=C(OC)C=C3)=O)C=C1)CCCCC4SSCC4	0.998969
GNP12	5	310	O=C(NC1=CC=C(CC(NC(C2=CC=CC=C2)=O)C(NCC3=CC=C(OCO4)C4=C3)=O)C=C1)CCCCC5SSCC5	1.24691
GNP13	5	310	O=C(NC1=CC=C(CC(NC(C2=CC=CC=C2)=O)C(NC(C3=CC=C(O)C=C3)C(OC)=O)=O)C=C1)CCCCC4SSCC4	0.471779
GNP14	5	310	O=C(NC1=CC=C(CC(NC(C2=CC=CC=C2)=O)C(O)=O)C=C1)CCCCC3SSCC3	8.06257
GNP15	5	310	O=C(NC1=CC=C(CC(NC(C2=CC=CC=C2)=O)C(OC)=O)C=C1)CCCCC3SSCC3	1.71096
GNP16	5	310	O=C(NC1=CC=C(CC(NC(C2=CC=CC=C2)=O)C(NC3C(O)C(O)C(CO)OC3O)=O)C=C1)CCCCC4SSCC4	8.09304
GNP17	5	310	O=C(NC1=CC=C(CC(NC(CC2=CC=CC=C2)=O)C(NCCCC)=O)C=C1)CCCCC3SSCC3	0.976211
GNP18	5	310	O=C(NC1=CC=C(CC(NC(CC2=CC=CC=C2)=O)C(NC3CCCCC3)=O)C=C1)CCCCC4SSCC4	1.53046
GNP19	5	310	O=C(NC1=CC=C(CC(NC(CC2=CC=CC=C2)=O)C(NCCC3=CC(OC)=C(OC)C=C3)=O)C=C1)CCCCC4SSCC4	1.01176
GNP20	5	310	O=C(NC1=CC=C(CC(NC(CC2=CC=CC=C2)=O)C(NCC3=CC=C(OCO4)C4=C3)=O)C=C1)CCCCC5SSCC5	2.26319
GNP21	5	310	O=C(NC1=CC=C(CC(NC(CC2=CC=CC=C2)=O)C(NC(C3=CC=C(O)C=C3)C(OC)=O)=O)C=C1)CCCCC4SSCC4	0.528252
GNP22	5	310	O=C(NC1=CC=C(CC(NC(CC2=CC=CC=C2)=O)C(O)=O)C=C1)CCCCC3SSCC3	7.8569
GNP23	5	310	O=C(NC1=CC=C(CC(NC(CC2=CC=CC=C2)=O)C(OC)=O)C=C1)CCCCC3SSCC3	2.69676
GNP24	5	310	O=C(NC1=CC=C(CC(NC(CC2=CC=CC=C2)=O)C(NC3C(O)C(O)C(CO)OC3O)=O)C=C1)CCCCC4SSCC4	9.86205
GNP25	5	310	O=C(NC1=CC=C(CC(NC(CCC=C)=O)C(NCCCC)=O)C=C1)CCCCC2SSCC2	0.502778
GNP26	5	310	O=C(NC1=CC=C(CC(NC(CCC=C)=O)C(NC2CCCCC2)=O)C=C1)CCCCC3SSCC3	1.6241
GNP27	5	310	O=C(NC1=CC=C(CC(NC(CCC=C)=O)C(NCCC2=CC(OC)=C(OC)C=C2)=O)C=C1)CCCCC3SSCC3	1.80918
GNP28	5	310	O=C(NC1=CC=C(CC(NC(CCC=C)=O)C(NCC2=CC(OCO3)=C3C=C2)=O)C=C1)CCCCC4SSCC4	1.18199
GNP29	5	310	O=C(NC1=CC=C(CC(NC(CCC=C)=O)C(NC(C2=CC=C(O)C=C2)C(OC)=O)=O)C=C1)CCCCC3SSCC3	0.51452
GNP30	5	310	O=C(NC1=CC=C(CC(NC(CCC=C)=O)C(O)=O)C=C1)CCCCC2SSCC2	6.42704
GNP31	5	310	O=C(NC1=CC=C(CC(NC(CCC=C)=O)C(OC)=O)C=C1)CCCCC2SSCC2	0.885844
GNP32	5	310	O=C(NC1=CC=C(CC(NC(CCC=C)=O)C(NC2C(O)C(O)C(CO)OC2O)=O)C=C1)CCCCC3SSCC3	8.30921
GNP33	5	310	O=C(NC1=CC=C(CC(NC(C2=CC=C(Cl)C=C2)=O)C(NCCCC)=O)C=C1)CCCCC3SSCC3	0.560864
GNP34	5	310	O=C(NC1=CC=C(CC(NC(C2=CC=C(Cl)C=C2)=O)C(NC3CCCCC3)=O)C=C1)CCCCC4SSCC4	1.86242
GNP35	5	310	O=C(NC1=CC=C(CC(NC(C2=CC=C(Cl)C=C2)=O)C(NCCC3=CC=C(OC)C(OC)=C3)=O)C=C1)CCCCC4SSCC4	1.30754
GNP36	5	310	O=C(NC1=CC=C(CC(NC(C2=CC=C(Cl)C=C2)=O)C(NCC3=CC=C(OCO4)C4=C3)=O)C=C1)CCCCC5SSCC5	1.96759
GNP37	5	310	O=C(NC1=CC=C(CC(NC(C2=CC=C(Cl)C=C2)=O)C(NC(C3=CC=C(O)C=C3)C(OC)=O)=O)C=C1)CCCCC4SSCC4	1.72047
GNP38	5	310	O=C(NC1=CC=C(CC(NC(C2=CC=C(Cl)C=C2)=O)C(O)=O)C=C1)CCCCC3SSCC3	1.28039
GNP39	5	310	O=C(NC1=CC=C(CC(NC(C2=CC=C(Cl)C=C2)=O)C(OC)=O)C=C1)CCCCC3SSCC3	0.724496
GNP40	5	310	O=C(NC1=CC=C(CC(NC(C2=CC=C(Cl)C=C2)=O)C(NC3C(O)C(O)C(CO)OC3O)=O)C=C1)CCCCC4SSCC4	6.59237
GNP41	5	310	O=C(NC1=CC=C(CC(NS(=O)(C2=CC=C(C)C=C2)=O)C(NCCCC)=O)C=C1)CCCCC3SSCC3	0.988714
GNP42	5	310	O=C(NC1=CC=C(CC(NS(=O)(C2=CC=C(C)C=C2)=O)C(NC3CCCCC3)=O)C=C1)CCCCC4SSCC4	1.71729
GNP43	5	310	O=C(NC1=CC=C(CC(NS(=O)(C2=CC=C(C)C=C2)=O)C(NCCC3=CC(OC)=C(OC)C=C3)=O)C=C1)CCCCC4SSCC4	2.40257
GNP44	5	310	O=C(NC1=CC=C(CC(NS(=O)(C2=CC=C(C)C=C2)=O)C(NCC3=CC=C(OCO4)C4=C3)=O)C=C1)CCCCC5SSCC5	1.10612
GNP45	5	310	O=C(NC1=CC=C(CC(NS(=O)(C2=CC=C(C)C=C2)=O)C(NC(C3=CC=C(O)C=C3)C(OC)=O)=O)C=C1)CCCCC4SSCC4	0.860502
GNP46	5	310	O=C(NC1=CC=C(CC(NS(=O)(C2=CC=C(C)C=C2)=O)C(O)=O)C=C1)CCCCC3SSCC3	4.21993
GNP47	5	310	O=C(NC1=CC=C(CC(NS(=O)(C2=CC=C(C)C=C2)=O)C(OC)=O)C=C1)CCCCC3SSCC3	1.54876

## Sheet: Excel Table S2
Index	Size [nm]	#Ligand1	#Ligand2	Ligand1 SMILES	Ligand2 SMILES	Cellular uptake in HEK293 [10-11 g Au/Cell]
GNP48	7.3	459	0	S1SC(CC1)CCCCC(NCCOCCOCCO)=O	-	1.68713
GNP49	6.8	346	40	S1SC(CC1)CCCCC(NCCOCCOCCO)=O	S1SC(CC1)CCCCC(NCCCCCCCCCCC)=O	1.58667
GNP50	8.5	311	107	S1SC(CC1)CCCCC(NCCOCCOCCO)=O	S1SC(CC1)CCCCC(NCCCCCCCCCCC)=O	10.6047
GNP51	8	240	251	S1SC(CC1)CCCCC(NCCOCCOCCO)=O	S1SC(CC1)CCCCC(NCCCCCCCCCCC)=O	10.0027
GNP52	7.5	147	390	S1SC(CC1)CCCCC(NCCOCCOCCO)=O	S1SC(CC1)CCCCC(NCCCCCCCCCCC)=O	13.5738
GNP53	8	86	477	S1SC(CC1)CCCCC(NCCOCCOCCO)=O	S1SC(CC1)CCCCC(NCCCCCCCCCCC)=O	17.2558
GNP54	6.7	0	727	-	S1SC(CC1)CCCCC(NCCCCCCCCCCC)=O	16.3883
GNP55	5.8	0	232	-	S1SC(CC1)CCCCC(N)=O	0.961439
GNP56	5.8	21	116	S1SC(CC1)CCCCC(NCCCN)=O	S1SC(CC1)CCCCC(N)=O	1.2877
GNP57	5.8	31	101	S1SC(CC1)CCCCC(NCCCN)=O	S1SC(CC1)CCCCC(N)=O	3.57694
GNP58	5.8	82	75	S1SC(CC1)CCCCC(NCCCN)=O	S1SC(CC1)CCCCC(N)=O	5.20283
GNP59	5.8	144	0	S1SC(CC1)CCCCC(NCCCN)=O	-	8.12942
GNP60	5.8	31	201	S1SC(CC1)CCCCC(O)=O	S1SC(CC1)CCCCC(N)=O	0.895466
GNP61	5.8	124	108	S1SC(CC1)CCCCC(O)=O	S1SC(CC1)CCCCC(N)=O	0.907214
GNP62	5.8	170	62	S1SC(CC1)CCCCC(O)=O	S1SC(CC1)CCCCC(N)=O	0.866436
GNP63	5.8	287	0	S1SC(CC1)CCCCC(O)=O	-	0.820145
GNP64	6.9	67	676	S1SC(CC1)CCCCC(NCCOCCOCCOCCOC)=O	S1SC(CC1)CCCCC(N)=O	2.30522
GNP65	6.6	158	472	S1SC(CC1)CCCCC(NCCOCCOCCOCCOC)=O	S1SC(CC1)CCCCC(N)=O	1.72632
GNP66	6.4	268	327	S1SC(CC1)CCCCC(NCCOCCOCCOCCOC)=O	S1SC(CC1)CCCCC(N)=O	1.4971
GNP67	6.5	720	0	S1SC(CC1)CCCCC(NCCOCCOCCOCCOC)=O	S1SC(CC1)CCCCC(N)=O	1.67399
GNP68	4.9	92	673	S1SC(CC1)CCCCC(NCC(C(C(C(O)O)O)O)O)=O	S1SC(CC1)CCCCC(N)=O	0.957257
GNP69	5	226	502	S1SC(CC1)CCCCC(NCC(C(C(C(O)O)O)O)O)=O	S1SC(CC1)CCCCC(N)=O	0.890874
GNP70	5.7	542	221	S1SC(CC1)CCCCC(NCC(C(C(C(O)O)O)O)O)=O	S1SC(CC1)CCCCC(N)=O	0.88751
GNP71	8	810	0	S1SC(CC1)CCCCC(NCC(C(C(C(O)O)O)O)O)=O	-	2.34933
GNP72	7.3	0	869	-	S1SC(CC1)CCCCC(NC1CCCCC1)=O	19.8169
GNP73	7.3	174	695	S1SC(CC1)CCCCC(Nc1ccccc1)=O	S1SC(CC1)CCCCC(NC1CCCCC1)=O	20.8809
GNP74	7.3	521	348	S1SC(CC1)CCCCC(Nc1ccccc1)=O	S1SC(CC1)CCCCC(NC1CCCCC1)=O	21.9671
GNP75	7.3	695	174	S1SC(CC1)CCCCC(Nc1ccccc1)=O	S1SC(CC1)CCCCC(NC1CCCCC1)=O	20.6687
GNP76	7.3	869	0	S1SC(CC1)CCCCC(Nc1ccccc1)=O	-	20.6688
GNP77	5.9	795	0	S1SC(CC1)CCCCC(NC(C(C)(C)C)C)=O	-	10.7241
GNP78	5.9	682	0	S1SC(CC1)CCCCC(N(CCC)CCC)=O	-	10.9381
GNP79	5.9	830	0	S1SC(CC1)CCCCC(NC(CC(C)C)C)=O	-	10.5623
GNP80	5.9	698	0	S1SC(CC1)CCCCC(NCCCCCC)=O	-	10.7908
GNP81	5.9	703	0	S1SC(CC1)CCCCC(NC12CC3CC(CC(C3)C1)C2)=O	-	10.7764
GNP82	5.8	42	102	S1SC(CC1)CCCCC(NCCCN)=O	S1SC(CC1)CCCCC(N)=O	4.55247
GNP83	5.8	47	185	S1SC(CC1)CCCCC(O)=O	S1SC(CC1)CCCCC(N)=O	0.794836
GNP84	5.2	380	126	S1SC(CC1)CCCCC(NCCOCCOCCOCCOC)=O	S1SC(CC1)CCCCC(N)=O	0.860081
GNP85	5	235	275	S1SC(CC1)CCCCC(NCC(C(C(C(O)O)O)O)O)=O	S1SC(CC1)CCCCC(N)=O	0.750563
GNP86	7.3	348	521	S1SC(CC1)CCCCC(Nc1ccccc1)=O	S1SC(CC1)CCCCC(NC1CCCCC1)=O	21.9625
GNP87	5.9	869	0	S1SC(CC1)CCCCC(NC1CCCCCC1)=O	-	11.0822
GNP88	6.5	0	536	-	S1SC(CC1)CCCCC(NCCCCCCCCCCC)=O	11.7093

## Sheet: Excel Table S3
Index	Size [nm]	#Ligand1	#Ligand2	Ligand1 SMILES	Ligand2 SMILES	ROS levels in HEK293
GNP48	7.3	459	0	S1SC(CC1)CCCCC(NCCOCCOCCO)=O	-	1.192
GNP49	6.8	346	40	S1SC(CC1)CCCCC(NCCOCCOCCO)=O	S1SC(CC1)CCCCC(NCCCCCCCCCCC)=O	1.382
GNP50	8.5	311	107	S1SC(CC1)CCCCC(NCCOCCOCCO)=O	S1SC(CC1)CCCCC(NCCCCCCCCCCC)=O	1.428
GNP51	8	240	251	S1SC(CC1)CCCCC(NCCOCCOCCO)=O	S1SC(CC1)CCCCC(NCCCCCCCCCCC)=O	2.003
GNP52	7.5	147	390	S1SC(CC1)CCCCC(NCCOCCOCCO)=O	S1SC(CC1)CCCCC(NCCCCCCCCCCC)=O	2.911
GNP53	8	86	477	S1SC(CC1)CCCCC(NCCOCCOCCO)=O	S1SC(CC1)CCCCC(NCCCCCCCCCCC)=O	2.622
GNP54	6.7	0	727	-	S1SC(CC1)CCCCC(NCCCCCCCCCCC)=O	3.529
GNP55	5.8	0	232	-	S1SC(CC1)CCCCC(N)=O	1.255
GNP56	5.8	21	116	S1SC(CC1)CCCCC(NCCCN)=O	S1SC(CC1)CCCCC(N)=O	1.567
GNP57	5.8	31	101	S1SC(CC1)CCCCC(NCCCN)=O	S1SC(CC1)CCCCC(N)=O	2.572
GNP58	5.8	82	75	S1SC(CC1)CCCCC(NCCCN)=O	S1SC(CC1)CCCCC(N)=O	3.162
GNP59	5.8	144	0	S1SC(CC1)CCCCC(NCCCN)=O	-	3.517
GNP60	5.8	31	201	S1SC(CC1)CCCCC(O)=O	S1SC(CC1)CCCCC(N)=O	1.221
GNP61	5.8	124	108	S1SC(CC1)CCCCC(O)=O	S1SC(CC1)CCCCC(N)=O	1.137
GNP62	5.8	170	62	S1SC(CC1)CCCCC(O)=O	S1SC(CC1)CCCCC(N)=O	1.128
GNP63	5.8	287	0	S1SC(CC1)CCCCC(O)=O	-	1.293
GNP64	6.9	67	676	S1SC(CC1)CCCCC(NCCOCCOCCOCCOC)=O	S1SC(CC1)CCCCC(N)=O	1.522
GNP65	6.6	158	472	S1SC(CC1)CCCCC(NCCOCCOCCOCCOC)=O	S1SC(CC1)CCCCC(N)=O	1.293
GNP66	6.4	268	327	S1SC(CC1)CCCCC(NCCOCCOCCOCCOC)=O	S1SC(CC1)CCCCC(N)=O	1.236
GNP67	6.5	720	0	S1SC(CC1)CCCCC(NCCOCCOCCOCCOC)=O	S1SC(CC1)CCCCC(N)=O	1.284
GNP68	4.9	92	673	S1SC(CC1)CCCCC(NCC(C(C(C(O)O)O)O)O)=O	S1SC(CC1)CCCCC(N)=O	1.573
GNP69	5	226	502	S1SC(CC1)CCCCC(NCC(C(C(C(O)O)O)O)O)=O	S1SC(CC1)CCCCC(N)=O	1.288
GNP70	5.7	542	221	S1SC(CC1)CCCCC(NCC(C(C(C(O)O)O)O)O)=O	S1SC(CC1)CCCCC(N)=O	1.262
GNP71	8	810	0	S1SC(CC1)CCCCC(NCC(C(C(C(O)O)O)O)O)=O	-	1.283
GNP72	7.3	0	869	-	S1SC(CC1)CCCCC(NC1CCCCC1)=O	1.849
GNP73	7.3	174	695	S1SC(CC1)CCCCC(Nc1ccccc1)=O	S1SC(CC1)CCCCC(NC1CCCCC1)=O	2.037
GNP74	7.3	521	348	S1SC(CC1)CCCCC(Nc1ccccc1)=O	S1SC(CC1)CCCCC(NC1CCCCC1)=O	1.93
GNP75	7.3	695	174	S1SC(CC1)CCCCC(Nc1ccccc1)=O	S1SC(CC1)CCCCC(NC1CCCCC1)=O	1.992
GNP76	7.3	869	0	S1SC(CC1)CCCCC(Nc1ccccc1)=O	-	1.905
GNP77	5.9	795	0	S1SC(CC1)CCCCC(NC(C(C)(C)C)C)=O	-	1.974
GNP78	5.9	682	0	S1SC(CC1)CCCCC(N(CCC)CCC)=O	-	1.895
GNP79	5.9	830	0	S1SC(CC1)CCCCC(NC(CC(C)C)C)=O	-	2.016
GNP80	5.9	698	0	S1SC(CC1)CCCCC(NCCCCCC)=O	-	2.196
GNP81	5.9	703	0	S1SC(CC1)CCCCC(NC12CC3CC(CC(C3)C1)C2)=O	-	2.006
GNP82	5.8	42	102	S1SC(CC1)CCCCC(NCCCN)=O	S1SC(CC1)CCCCC(N)=O	2.708
GNP83	5.8	47	185	S1SC(CC1)CCCCC(O)=O	S1SC(CC1)CCCCC(N)=O	1.216
GNP84	5.2	380	126	S1SC(CC1)CCCCC(NCCOCCOCCOCCOC)=O	S1SC(CC1)CCCCC(N)=O	1.295
GNP85	5	235	275	S1SC(CC1)CCCCC(NCC(C(C(C(O)O)O)O)O)=O	S1SC(CC1)CCCCC(N)=O	1.297
GNP86	7.3	348	521	S1SC(CC1)CCCCC(Nc1ccccc1)=O	S1SC(CC1)CCCCC(NC1CCCCC1)=O	2.001
GNP87	5.9	869	0	S1SC(CC1)CCCCC(NC1CCCCCC1)=O	-	2.121
GNP88	6.5	0	536	-	S1SC(CC1)CCCCC(NCCCCCCCCCCC)=O	2.636

## Sheet: Excel Table S4
Index	Size [nm]	#Ligand1	#Ligand2	Ligand1 SMILES	Ligand2 SMILES	Cellular uptake in A549 [10-11 g Au/Cell]
GNP48	7.3	459	0	S1SC(CC1)CCCCC(NCCOCCOCCO)=O	-	0.792274
GNP49	6.8	346	40	S1SC(CC1)CCCCC(NCCOCCOCCO)=O	S1SC(CC1)CCCCC(NCCCCCCCCCCC)=O	1.29091
GNP50	8.5	311	107	S1SC(CC1)CCCCC(NCCOCCOCCO)=O	S1SC(CC1)CCCCC(NCCCCCCCCCCC)=O	8.21651
GNP51	8	240	251	S1SC(CC1)CCCCC(NCCOCCOCCO)=O	S1SC(CC1)CCCCC(NCCCCCCCCCCC)=O	8.95972
GNP52	7.5	147	390	S1SC(CC1)CCCCC(NCCOCCOCCO)=O	S1SC(CC1)CCCCC(NCCCCCCCCCCC)=O	10.2731
GNP53	8	86	477	S1SC(CC1)CCCCC(NCCOCCOCCO)=O	S1SC(CC1)CCCCC(NCCCCCCCCCCC)=O	12.9655
GNP54	6.7	0	727	-	S1SC(CC1)CCCCC(NCCCCCCCCCCC)=O	18.63
GNP55	5.8	0	232	-	S1SC(CC1)CCCCC(N)=O	0.972199
GNP56	5.8	21	116	S1SC(CC1)CCCCC(NCCCN)=O	S1SC(CC1)CCCCC(N)=O	1.47548
GNP57	5.8	31	101	S1SC(CC1)CCCCC(NCCCN)=O	S1SC(CC1)CCCCC(N)=O	3.24252
GNP58	5.8	82	75	S1SC(CC1)CCCCC(NCCCN)=O	S1SC(CC1)CCCCC(N)=O	4.72184
GNP59	5.8	144	0	S1SC(CC1)CCCCC(NCCCN)=O	-	9.58657
GNP60	5.8	31	201	S1SC(CC1)CCCCC(O)=O	S1SC(CC1)CCCCC(N)=O	0.800867
GNP61	5.8	124	108	S1SC(CC1)CCCCC(O)=O	S1SC(CC1)CCCCC(N)=O	0.938569
GNP62	5.8	170	62	S1SC(CC1)CCCCC(O)=O	S1SC(CC1)CCCCC(N)=O	0.836095
GNP63	5.8	287	0	S1SC(CC1)CCCCC(O)=O	-	0.864639
GNP64	6.9	67	676	S1SC(CC1)CCCCC(NCCOCCOCCOCCOC)=O	S1SC(CC1)CCCCC(N)=O	2.27502
GNP65	6.6	158	472	S1SC(CC1)CCCCC(NCCOCCOCCOCCOC)=O	S1SC(CC1)CCCCC(N)=O	1.76136
GNP66	6.4	268	327	S1SC(CC1)CCCCC(NCCOCCOCCOCCOC)=O	S1SC(CC1)CCCCC(N)=O	1.52519
GNP67	6.5	720	0	S1SC(CC1)CCCCC(NCCOCCOCCOCCOC)=O	S1SC(CC1)CCCCC(N)=O	1.72559
GNP68	4.9	92	673	S1SC(CC1)CCCCC(NCC(C(C(C(O)O)O)O)O)=O	S1SC(CC1)CCCCC(N)=O	1.01027
GNP69	5	226	502	S1SC(CC1)CCCCC(NCC(C(C(C(O)O)O)O)O)=O	S1SC(CC1)CCCCC(N)=O	0.865649
GNP70	5.7	542	221	S1SC(CC1)CCCCC(NCC(C(C(C(O)O)O)O)O)=O	S1SC(CC1)CCCCC(N)=O	0.91263
GNP71	8	810	0	S1SC(CC1)CCCCC(NCC(C(C(C(O)O)O)O)O)=O	-	2.47941
GNP72	7.3	0	869	-	S1SC(CC1)CCCCC(NC1CCCCC1)=O	19.1455
GNP73	7.3	174	695	S1SC(CC1)CCCCC(Nc1ccccc1)=O	S1SC(CC1)CCCCC(NC1CCCCC1)=O	19.7838
GNP74	7.3	521	348	S1SC(CC1)CCCCC(Nc1ccccc1)=O	S1SC(CC1)CCCCC(NC1CCCCC1)=O	21.1894
GNP75	7.3	695	174	S1SC(CC1)CCCCC(Nc1ccccc1)=O	S1SC(CC1)CCCCC(NC1CCCCC1)=O	21.9843
GNP76	7.3	869	0	S1SC(CC1)CCCCC(Nc1ccccc1)=O	-	22.8142
GNP77	5.9	795	0	S1SC(CC1)CCCCC(NC(C(C)(C)C)C)=O	-	11.066
GNP78	5.9	682	0	S1SC(CC1)CCCCC(N(CCC)CCC)=O	-	12.1255
GNP79	5.9	830	0	S1SC(CC1)CCCCC(NC(CC(C)C)C)=O	-	11.2211
GNP80	5.9	698	0	S1SC(CC1)CCCCC(NCCCCCC)=O	-	11.201
GNP81	5.9	703	0	S1SC(CC1)CCCCC(NC12CC3CC(CC(C3)C1)C2)=O	-	11.5214
GNP82	5.8	42	102	S1SC(CC1)CCCCC(NCCCN)=O	S1SC(CC1)CCCCC(N)=O	4.60667
GNP83	5.8	47	185	S1SC(CC1)CCCCC(O)=O	S1SC(CC1)CCCCC(N)=O	0.778947
GNP84	5.2	380	126	S1SC(CC1)CCCCC(NCCOCCOCCOCCOC)=O	S1SC(CC1)CCCCC(N)=O	0.889186
GNP85	5	235	275	S1SC(CC1)CCCCC(NCC(C(C(C(O)O)O)O)O)=O	S1SC(CC1)CCCCC(N)=O	0.738033
GNP86	7.3	348	521	S1SC(CC1)CCCCC(Nc1ccccc1)=O	S1SC(CC1)CCCCC(NC1CCCCC1)=O	20.8385
GNP87	5.9	869	0	S1SC(CC1)CCCCC(NC1CCCCCC1)=O	-	10.4655
GNP88	6.5	0	536	-	S1SC(CC1)CCCCC(NCCCCCCCCCCC)=O	14.2012
GNP89	5	30	270	O=C(O)C(NC(=O)c1ccc(NCc2nc3c(O)nc(N)nc3nc2)cc1)CCC(=O)NCCCOCCOCCOCCCNC(=O)CCCCC1SSCC1	O=C(NC1=CC=C(CC(NC(CC2CCCC2)=O)C(NCCCC)=O)C=C1)CCCCC3SSCC3	0.96
GNP90	5	30	270	O=C(O)C(NC(=O)c1ccc(NCc2nc3c(O)nc(N)nc3nc2)cc1)CCC(=O)NCCCOCCOCCOCCCNC(=O)CCCCC1SSCC2	O=C(NC1=CC=C(CC(NC(CC(CC)C)=O)C(NC2CCCCC2)=O)C=C1)CCCCC3SSCC3	1.02
GNP91	5	30	270	O=C(O)C(NC(=O)c1ccc(NCc2nc3c(O)nc(N)nc3nc2)cc1)CCC(=O)NCCCOCCOCCOCCCNC(=O)CCCCC1SSCC3	O=C(NC1=CC=C(CC(NC(CC2CCCC2)=O)C(NCCC3=CC=C(OC)C(OC)=C3)=O)C=C1)CCCCC4SSCC4	2.15
GNP92	5	30	270	O=C(O)C(NC(=O)c1ccc(NCc2nc3c(O)nc(N)nc3nc2)cc1)CCC(=O)NCCCOCCOCCOCCCNC(=O)CCCCC1SSCC4	O=C(NC1=CC=C(CC(NC(CC2CCCC2)=O)C(NCC3=CC=C(OCO4)C4=C3)=O)C=C1)CCCCC5SSCC5	1.49
GNP93	5	30	270	O=C(O)C(NC(=O)c1ccc(NCc2nc3c(O)nc(N)nc3nc2)cc1)CCC(=O)NCCCOCCOCCOCCCNC(=O)CCCCC1SSCC5	O=C(NC1=CC=C(CC(NC(CC2CCCC2)=O)C(NC(C3=CC=C(O)C=C3)C(OC)=O)=O)C=C1)CCCCC4SSCC4	2.86
GNP94	5	30	270	O=C(O)C(NC(=O)c1ccc(NCc2nc3c(O)nc(N)nc3nc2)cc1)CCC(=O)NCCCOCCOCCOCCCNC(=O)CCCCC1SSCC6	O=C(NC1=CC=C(CC(NC(CC2CCCC2)=O)C(NC3C(O)C(O)C(CO)OC3O)=O)C=C1)CCCCC4SSCC4	5.95
GNP95	5	30	270	O=C(O)C(NC(=O)c1ccc(NCc2nc3c(O)nc(N)nc3nc2)cc1)CCC(=O)NCCCOCCOCCOCCCNC(=O)CCCCC1SSCC7	O=C(NC1=CC=C(CC(NC(C2=CC=CC=C2)=O)C(NCCCC)=O)C=C1)CCCCC3SSCC3	4.52
GNP96	5	30	270	O=C(O)C(NC(=O)c1ccc(NCc2nc3c(O)nc(N)nc3nc2)cc1)CCC(=O)NCCCOCCOCCOCCCNC(=O)CCCCC1SSCC8	O=C(NC1=CC=C(CC(NC(C2=CC=CC=C2)=O)C(NC3CCCCC3)=O)C=C1)CCCCC4SSCC4	2.99
GNP97	5	30	270	O=C(O)C(NC(=O)c1ccc(NCc2nc3c(O)nc(N)nc3nc2)cc1)CCC(=O)NCCCOCCOCCOCCCNC(=O)CCCCC1SSCC9	O=C(NC1=CC=C(CC(NC(C2=CC=CC=C2)=O)C(NCCC3=CC(OC)=C(OC)C=C3)=O)C=C1)CCCCC4SSCC4	3.58
GNP98	5	30	270	O=C(O)C(NC(=O)c1ccc(NCc2nc3c(O)nc(N)nc3nc2)cc1)CCC(=O)NCCCOCCOCCOCCCNC(=O)CCCCC1SSCC10	O=C(NC1=CC=C(CC(NC(C2=CC=CC=C2)=O)C(NCC3=CC=C(OCO4)C4=C3)=O)C=C1)CCCCC5SSCC5	2.38
GNP99	5	30	270	O=C(O)C(NC(=O)c1ccc(NCc2nc3c(O)nc(N)nc3nc2)cc1)CCC(=O)NCCCOCCOCCOCCCNC(=O)CCCCC1SSCC11	O=C(NC1=CC=C(CC(NC(C2=CC=CC=C2)=O)C(NC(C3=CC=C(O)C=C3)C(OC)=O)=O)C=C1)CCCCC4SSCC4	1.81
GNP100	5	30	270	O=C(O)C(NC(=O)c1ccc(NCc2nc3c(O)nc(N)nc3nc2)cc1)CCC(=O)NCCCOCCOCCOCCCNC(=O)CCCCC1SSCC12	O=C(NC1=CC=C(CC(NC(C2=CC=CC=C2)=O)C(NC3C(O)C(O)C(CO)OC3O)=O)C=C1)CCCCC4SSCC4	3.4
GNP101	5	30	270	O=C(O)C(NC(=O)c1ccc(NCc2nc3c(O)nc(N)nc3nc2)cc1)CCC(=O)NCCCOCCOCCOCCCNC(=O)CCCCC1SSCC13	O=C(NC1=CC=C(CC(NC(CC2=CC=CC=C2)=O)C(NCCCC)=O)C=C1)CCCCC3SSCC3	1.01
GNP102	5	30	270	O=C(O)C(NC(=O)c1ccc(NCc2nc3c(O)nc(N)nc3nc2)cc1)CCC(=O)NCCCOCCOCCOCCCNC(=O)CCCCC1SSCC14	O=C(NC1=CC=C(CC(NC(CC2=CC=CC=C2)=O)C(NC3CCCCC3)=O)C=C1)CCCCC4SSCC4	1.32
GNP103	5	30	270	O=C(O)C(NC(=O)c1ccc(NCc2nc3c(O)nc(N)nc3nc2)cc1)CCC(=O)NCCCOCCOCCOCCCNC(=O)CCCCC1SSCC15	O=C(NC1=CC=C(CC(NC(CC2=CC=CC=C2)=O)C(NCCC3=CC(OC)=C(OC)C=C3)=O)C=C1)CCCCC4SSCC4	1.62
GNP104	5	30	270	O=C(O)C(NC(=O)c1ccc(NCc2nc3c(O)nc(N)nc3nc2)cc1)CCC(=O)NCCCOCCOCCOCCCNC(=O)CCCCC1SSCC16	O=C(NC1=CC=C(CC(NC(CC2=CC=CC=C2)=O)C(NCC3=CC=C(OCO4)C4=C3)=O)C=C1)CCCCC5SSCC5	1.43
GNP105	5	30	270	O=C(O)C(NC(=O)c1ccc(NCc2nc3c(O)nc(N)nc3nc2)cc1)CCC(=O)NCCCOCCOCCOCCCNC(=O)CCCCC1SSCC17	O=C(NC1=CC=C(CC(NC(CC2=CC=CC=C2)=O)C(NC(C3=CC=C(O)C=C3)C(OC)=O)=O)C=C1)CCCCC4SSCC4	1.44
GNP106	5	30	270	O=C(O)C(NC(=O)c1ccc(NCc2nc3c(O)nc(N)nc3nc2)cc1)CCC(=O)NCCCOCCOCCOCCCNC(=O)CCCCC1SSCC18	O=C(NC1=CC=C(CC(NC(CC2=CC=CC=C2)=O)C(NC3C(O)C(O)C(CO)OC3O)=O)C=C1)CCCCC4SSCC4	5.17
GNP107	5	30	270	O=C(O)C(NC(=O)c1ccc(NCc2nc3c(O)nc(N)nc3nc2)cc1)CCC(=O)NCCCOCCOCCOCCCNC(=O)CCCCC1SSCC19	O=C(NC1=CC=C(CC(NC(CCC=C)=O)C(NCCCC)=O)C=C1)CCCCC2SSCC2	1.83
GNP108	5	30	270	O=C(O)C(NC(=O)c1ccc(NCc2nc3c(O)nc(N)nc3nc2)cc1)CCC(=O)NCCCOCCOCCOCCCNC(=O)CCCCC1SSCC20	O=C(NC1=CC=C(CC(NC(CCC=C)=O)C(NC2CCCCC2)=O)C=C1)CCCCC3SSCC3	1.88
GNP109	5	30	270	O=C(O)C(NC(=O)c1ccc(NCc2nc3c(O)nc(N)nc3nc2)cc1)CCC(=O)NCCCOCCOCCOCCCNC(=O)CCCCC1SSCC21	O=C(NC1=CC=C(CC(NC(CCC=C)=O)C(NCCC2=CC(OC)=C(OC)C=C2)=O)C=C1)CCCCC3SSCC3	1.79
GNP110	5	30	270	O=C(O)C(NC(=O)c1ccc(NCc2nc3c(O)nc(N)nc3nc2)cc1)CCC(=O)NCCCOCCOCCOCCCNC(=O)CCCCC1SSCC22	O=C(NC1=CC=C(CC(NC(CCC=C)=O)C(NCC2=CC(OCO3)=C3C=C2)=O)C=C1)CCCCC4SSCC4	1.96
GNP111	5	30	270	O=C(O)C(NC(=O)c1ccc(NCc2nc3c(O)nc(N)nc3nc2)cc1)CCC(=O)NCCCOCCOCCOCCCNC(=O)CCCCC1SSCC23	O=C(NC1=CC=C(CC(NC(CCC=C)=O)C(NC(C2=CC=C(O)C=C2)C(OC)=O)=O)C=C1)CCCCC3SSCC3	4.19
GNP112	5	30	270	O=C(O)C(NC(=O)c1ccc(NCc2nc3c(O)nc(N)nc3nc2)cc1)CCC(=O)NCCCOCCOCCOCCCNC(=O)CCCCC1SSCC24	O=C(NC1=CC=C(CC(NC(CCC=C)=O)C(NC2C(O)C(O)C(CO)OC2O)=O)C=C1)CCCCC3SSCC3	1.49
GNP113	5	30	270	O=C(O)C(NC(=O)c1ccc(NCc2nc3c(O)nc(N)nc3nc2)cc1)CCC(=O)NCCCOCCOCCOCCCNC(=O)CCCCC1SSCC25	O=C(NC1=CC=C(CC(NC(C2=CC=C(Cl)C=C2)=O)C(NCCCC)=O)C=C1)CCCCC3SSCC3	2.75
GNP114	5	30	270	O=C(O)C(NC(=O)c1ccc(NCc2nc3c(O)nc(N)nc3nc2)cc1)CCC(=O)NCCCOCCOCCOCCCNC(=O)CCCCC1SSCC26	O=C(NC1=CC=C(CC(NC(C2=CC=C(Cl)C=C2)=O)C(NC3CCCCC3)=O)C=C1)CCCCC4SSCC4	1.77
GNP115	5	30	270	O=C(O)C(NC(=O)c1ccc(NCc2nc3c(O)nc(N)nc3nc2)cc1)CCC(=O)NCCCOCCOCCOCCCNC(=O)CCCCC1SSCC27	O=C(NC1=CC=C(CC(NC(C2=CC=C(Cl)C=C2)=O)C(NCCC3=CC=C(OC)C(OC)=C3)=O)C=C1)CCCCC4SSCC4	3.82
GNP116	5	30	270	O=C(O)C(NC(=O)c1ccc(NCc2nc3c(O)nc(N)nc3nc2)cc1)CCC(=O)NCCCOCCOCCOCCCNC(=O)CCCCC1SSCC28	O=C(NC1=CC=C(CC(NC(C2=CC=C(Cl)C=C2)=O)C(NCC3=CC=C(OCO4)C4=C3)=O)C=C1)CCCCC5SSCC5	2.16
GNP117	5	30	270	O=C(O)C(NC(=O)c1ccc(NCc2nc3c(O)nc(N)nc3nc2)cc1)CCC(=O)NCCCOCCOCCOCCCNC(=O)CCCCC1SSCC29	O=C(NC1=CC=C(CC(NC(C2=CC=C(Cl)C=C2)=O)C(NC(C3=CC=C(O)C=C3)C(OC)=O)=O)C=C1)CCCCC4SSCC4	2.65
GNP118	5	30	270	O=C(O)C(NC(=O)c1ccc(NCc2nc3c(O)nc(N)nc3nc2)cc1)CCC(=O)NCCCOCCOCCOCCCNC(=O)CCCCC1SSCC30	O=C(NC1=CC=C(CC(NC(C2=CC=C(Cl)C=C2)=O)C(NC3C(O)C(O)C(CO)OC3O)=O)C=C1)CCCCC4SSCC4	2.7

## Sheet: Excel Table S5
Index	Size [nm]	#Ligand1	#Ligand2	Ligand1 SMILES	Ligand2 SMILES	logP
GNP1	5	310	0	O=C(NC1=CC=C(CC(NC(CC2CCCC2)=O)C(NCCCC)=O)C=C1)CCCCC3SSCC3	-	1.39
GNP2	5	310	0	O=C(NC1=CC=C(CC(NC(CC(CC)C)=O)C(NC2CCCCC2)=O)C=C1)CCCCC3SSCC3	-	1.22
GNP3	5	310	0	O=C(NC1=CC=C(CC(NC(CC2CCCC2)=O)C(NCCC3=CC=C(OC)C(OC)=C3)=O)C=C1)CCCCC4SSCC4	-	1.2
GNP4	5	310	0	O=C(NC1=CC=C(CC(NC(CC2CCCC2)=O)C(NCC3=CC=C(OCO4)C4=C3)=O)C=C1)CCCCC5SSCC5	-	1.84
GNP5	5	310	0	O=C(NC1=CC=C(CC(NC(CC2CCCC2)=O)C(NC(C3=CC=C(O)C=C3)C(OC)=O)=O)C=C1)CCCCC4SSCC4	-	0.99
GNP6	5	310	0	O=C(NC1=CC=C(CC(NC(CC2CCCC2)=O)C(O)=O)C=C1)CCCCC3SSCC3	-	1.99
GNP7	5	310	0	O=C(NC1=CC=C(CC(NC(CC2CCCC2)=O)C(OC)=O)C=C1)CCCCC3SSCC3	-	1.72
GNP9	5	310	0	O=C(NC1=CC=C(CC(NC(C2=CC=CC=C2)=O)C(NCCCC)=O)C=C1)CCCCC3SSCC3	-	-0.44
GNP10	5	310	0	O=C(NC1=CC=C(CC(NC(C2=CC=CC=C2)=O)C(NC3CCCCC3)=O)C=C1)CCCCC4SSCC4	-	0.54
GNP11	5	310	0	O=C(NC1=CC=C(CC(NC(C2=CC=CC=C2)=O)C(NCCC3=CC(OC)=C(OC)C=C3)=O)C=C1)CCCCC4SSCC4	-	1.21
GNP12	5	310	0	O=C(NC1=CC=C(CC(NC(C2=CC=CC=C2)=O)C(NCC3=CC=C(OCO4)C4=C3)=O)C=C1)CCCCC5SSCC5	-	1.16
GNP13	5	310	0	O=C(NC1=CC=C(CC(NC(C2=CC=CC=C2)=O)C(NC(C3=CC=C(O)C=C3)C(OC)=O)=O)C=C1)CCCCC4SSCC4	-	-0.29
GNP14	5	310	0	O=C(NC1=CC=C(CC(NC(C2=CC=CC=C2)=O)C(O)=O)C=C1)CCCCC3SSCC3	-	2
GNP15	5	310	0	O=C(NC1=CC=C(CC(NC(C2=CC=CC=C2)=O)C(OC)=O)C=C1)CCCCC3SSCC3	-	1.78
GNP17	5	310	0	O=C(NC1=CC=C(CC(NC(CC2=CC=CC=C2)=O)C(NCCCC)=O)C=C1)CCCCC3SSCC3	-	1.3
GNP18	5	310	0	O=C(NC1=CC=C(CC(NC(CC2=CC=CC=C2)=O)C(NC3CCCCC3)=O)C=C1)CCCCC4SSCC4	-	1.95
GNP19	5	310	0	O=C(NC1=CC=C(CC(NC(CC2=CC=CC=C2)=O)C(NCCC3=CC(OC)=C(OC)C=C3)=O)C=C1)CCCCC4SSCC4	-	0.26
GNP20	5	310	0	O=C(NC1=CC=C(CC(NC(CC2=CC=CC=C2)=O)C(NCC3=CC=C(OCO4)C4=C3)=O)C=C1)CCCCC5SSCC5	-	0.75
GNP21	5	310	0	O=C(NC1=CC=C(CC(NC(CC2=CC=CC=C2)=O)C(NC(C3=CC=C(O)C=C3)C(OC)=O)=O)C=C1)CCCCC4SSCC4	-	0.56
GNP22	5	310	0	O=C(NC1=CC=C(CC(NC(CC2=CC=CC=C2)=O)C(O)=O)C=C1)CCCCC3SSCC3	-	2.05
GNP23	5	310	0	O=C(NC1=CC=C(CC(NC(CC2=CC=CC=C2)=O)C(OC)=O)C=C1)CCCCC3SSCC3	-	2.06
GNP25	5	310	0	O=C(NC1=CC=C(CC(NC(CCC=C)=O)C(NCCCC)=O)C=C1)CCCCC2SSCC2	-	2.23
GNP26	5	310	0	O=C(NC1=CC=C(CC(NC(CCC=C)=O)C(NC2CCCCC2)=O)C=C1)CCCCC3SSCC3	-	2.15
GNP27	5	310	0	O=C(NC1=CC=C(CC(NC(CCC=C)=O)C(NCCC2=CC(OC)=C(OC)C=C2)=O)C=C1)CCCCC3SSCC3	-	2.72
GNP28	5	310	0	O=C(NC1=CC=C(CC(NC(CCC=C)=O)C(NCC2=CC(OCO3)=C3C=C2)=O)C=C1)CCCCC4SSCC4	-	0.46
GNP29	5	310	0	O=C(NC1=CC=C(CC(NC(CCC=C)=O)C(NC(C2=CC=C(O)C=C2)C(OC)=O)=O)C=C1)CCCCC3SSCC3	-	1.2
GNP30	5	310	0	O=C(NC1=CC=C(CC(NC(CCC=C)=O)C(O)=O)C=C1)CCCCC2SSCC2	-	2.36
GNP31	5	310	0	O=C(NC1=CC=C(CC(NC(CCC=C)=O)C(OC)=O)C=C1)CCCCC2SSCC2	-	0.95
GNP33	5	310	0	O=C(NC1=CC=C(CC(NC(C2=CC=C(Cl)C=C2)=O)C(NCCCC)=O)C=C1)CCCCC3SSCC3	-	1.53
GNP34	5	310	0	O=C(NC1=CC=C(CC(NC(C2=CC=C(Cl)C=C2)=O)C(NC3CCCCC3)=O)C=C1)CCCCC4SSCC4	-	2.27
GNP35	5	310	0	O=C(NC1=CC=C(CC(NC(C2=CC=C(Cl)C=C2)=O)C(NCCC3=CC=C(OC)C(OC)=C3)=O)C=C1)CCCCC4SSCC4	-	2.45
GNP36	5	310	0	O=C(NC1=CC=C(CC(NC(C2=CC=C(Cl)C=C2)=O)C(NCC3=CC=C(OCO4)C4=C3)=O)C=C1)CCCCC5SSCC5	-	2.31
GNP37	5	310	0	O=C(NC1=CC=C(CC(NC(C2=CC=C(Cl)C=C2)=O)C(NC(C3=CC=C(O)C=C3)C(OC)=O)=O)C=C1)CCCCC4SSCC4	-	2.34
GNP38	5	310	0	O=C(NC1=CC=C(CC(NC(C2=CC=C(Cl)C=C2)=O)C(O)=O)C=C1)CCCCC3SSCC3	-	1.99
GNP39	5	310	0	O=C(NC1=CC=C(CC(NC(C2=CC=C(Cl)C=C2)=O)C(OC)=O)C=C1)CCCCC3SSCC3	-	1.64
GNP41	5	310	0	O=C(NC1=CC=C(CC(NS(=O)(C2=CC=C(C)C=C2)=O)C(NCCCC)=O)C=C1)CCCCC3SSCC3	-	1.65
GNP42	5	310	0	O=C(NC1=CC=C(CC(NS(=O)(C2=CC=C(C)C=C2)=O)C(NC3CCCCC3)=O)C=C1)CCCCC4SSCC4	-	2.28
GNP43	5	310	0	O=C(NC1=CC=C(CC(NS(=O)(C2=CC=C(C)C=C2)=O)C(NCCC3=CC(OC)=C(OC)C=C3)=O)C=C1)CCCCC4SSCC4	-	1.71
GNP44	5	310	0	O=C(NC1=CC=C(CC(NS(=O)(C2=CC=C(C)C=C2)=O)C(NCC3=CC=C(OCO4)C4=C3)=O)C=C1)CCCCC5SSCC5	-	2.27
GNP45	5	310	0	O=C(NC1=CC=C(CC(NS(=O)(C2=CC=C(C)C=C2)=O)C(NC(C3=CC=C(O)C=C3)C(OC)=O)=O)C=C1)CCCCC4SSCC4	-	1.89
GNP46	5	310	0	O=C(NC1=CC=C(CC(NS(=O)(C2=CC=C(C)C=C2)=O)C(O)=O)C=C1)CCCCC3SSCC3	-	2.27
GNP47	5	310	0	O=C(NC1=CC=C(CC(NS(=O)(C2=CC=C(C)C=C2)=O)C(OC)=O)C=C1)CCCCC3SSCC3	-	2.06
GNP48	7.3	459	0	S1SC(CC1)CCCCC(NCCOCCOCCO)=O	-	-2.67
GNP49	6.8	346	40	S1SC(CC1)CCCCC(NCCOCCOCCO)=O	S1SC(CC1)CCCCC(NCCCCCCCCCCC)=O	-2.47
GNP50	8.5	311	107	S1SC(CC1)CCCCC(NCCOCCOCCO)=O	S1SC(CC1)CCCCC(NCCCCCCCCCCC)=O	-1.61
GNP51	8	240	251	S1SC(CC1)CCCCC(NCCOCCOCCO)=O	S1SC(CC1)CCCCC(NCCCCCCCCCCC)=O	-0.88
GNP52	7.5	147	390	S1SC(CC1)CCCCC(NCCOCCOCCO)=O	S1SC(CC1)CCCCC(NCCCCCCCCCCC)=O	-0.66
GNP53	8	86	477	S1SC(CC1)CCCCC(NCCOCCOCCO)=O	S1SC(CC1)CCCCC(NCCCCCCCCCCC)=O	-0.02
GNP54	6.7	0	727	-	S1SC(CC1)CCCCC(NCCCCCCCCCCC)=O	2.4
GNP55	5.8	0	232	-	S1SC(CC1)CCCCC(N)=O	-2.56
GNP56	5.8	21	116	S1SC(CC1)CCCCC(NCCCN)=O	S1SC(CC1)CCCCC(N)=O	-2.52
GNP57	5.8	31	101	S1SC(CC1)CCCCC(NCCCN)=O	S1SC(CC1)CCCCC(N)=O	-2.68
GNP58	5.8	82	75	S1SC(CC1)CCCCC(NCCCN)=O	S1SC(CC1)CCCCC(N)=O	-2.35
GNP59	5.8	144	0	S1SC(CC1)CCCCC(NCCCN)=O	-	-1.74
GNP60	5.8	31	201	S1SC(CC1)CCCCC(O)=O	S1SC(CC1)CCCCC(N)=O	-2.59
GNP61	5.8	124	108	S1SC(CC1)CCCCC(O)=O	S1SC(CC1)CCCCC(N)=O	-2.4
GNP62	5.8	170	62	S1SC(CC1)CCCCC(O)=O	S1SC(CC1)CCCCC(N)=O	-2.3
GNP63	5.8	287	0	S1SC(CC1)CCCCC(O)=O	-	-2.21
GNP64	6.9	67	676	S1SC(CC1)CCCCC(NCCOCCOCCOCCOC)=O	S1SC(CC1)CCCCC(N)=O	-1.72
GNP65	6.6	158	472	S1SC(CC1)CCCCC(NCCOCCOCCOCCOC)=O	S1SC(CC1)CCCCC(N)=O	-2.08
GNP66	6.4	268	327	S1SC(CC1)CCCCC(NCCOCCOCCOCCOC)=O	S1SC(CC1)CCCCC(N)=O	-2.19
GNP67	6.5	720	0	S1SC(CC1)CCCCC(NCCOCCOCCOCCOC)=O	S1SC(CC1)CCCCC(N)=O	-1.92
GNP68	4.9	92	673	S1SC(CC1)CCCCC(NCC(C(C(C(O)O)O)O)O)=O	S1SC(CC1)CCCCC(N)=O	-1.8
GNP69	5	226	502	S1SC(CC1)CCCCC(NCC(C(C(C(O)O)O)O)O)=O	S1SC(CC1)CCCCC(N)=O	-0.96
GNP70	5.7	542	221	S1SC(CC1)CCCCC(NCC(C(C(C(O)O)O)O)O)=O	S1SC(CC1)CCCCC(N)=O	-2.42
GNP71	8	810	0	S1SC(CC1)CCCCC(NCC(C(C(C(O)O)O)O)O)=O	-	-2.28
GNP72	7.3	0	869	-	S1SC(CC1)CCCCC(NC1CCCCC1)=O	2.06
GNP73	7.3	174	695	S1SC(CC1)CCCCC(Nc1ccccc1)=O	S1SC(CC1)CCCCC(NC1CCCCC1)=O	2.38
GNP74	7.3	521	348	S1SC(CC1)CCCCC(Nc1ccccc1)=O	S1SC(CC1)CCCCC(NC1CCCCC1)=O	2.72
GNP75	7.3	695	174	S1SC(CC1)CCCCC(Nc1ccccc1)=O	S1SC(CC1)CCCCC(NC1CCCCC1)=O	2.67
GNP76	7.3	869	0	S1SC(CC1)CCCCC(Nc1ccccc1)=O	-	2.7
GNP77	5.9	795	0	S1SC(CC1)CCCCC(NC(C(C)(C)C)C)=O	-	2.52
GNP78	5.9	682	0	S1SC(CC1)CCCCC(N(CCC)CCC)=O	-	2.28
GNP79	5.9	830	0	S1SC(CC1)CCCCC(NC(CC(C)C)C)=O	-	2.57
GNP80	5.9	698	0	S1SC(CC1)CCCCC(NCCCCCC)=O	-	1.76
GNP81	5.9	703	0	S1SC(CC1)CCCCC(NC12CC3CC(CC(C3)C1)C2)=O	-	1.98
GNP82	5.8	42	102	S1SC(CC1)CCCCC(NCCCN)=O	S1SC(CC1)CCCCC(N)=O	-2.54
GNP83	5.8	47	185	S1SC(CC1)CCCCC(O)=O	S1SC(CC1)CCCCC(N)=O	-2.13
GNP84	5.2	380	126	S1SC(CC1)CCCCC(NCCOCCOCCOCCOC)=O	S1SC(CC1)CCCCC(N)=O	-2.29
GNP85	5	235	275	S1SC(CC1)CCCCC(NCC(C(C(C(O)O)O)O)O)=O	S1SC(CC1)CCCCC(N)=O	-2.3
GNP86	7.3	348	521	S1SC(CC1)CCCCC(Nc1ccccc1)=O	S1SC(CC1)CCCCC(NC1CCCCC1)=O	2.39
GNP87	5.9	869	0	S1SC(CC1)CCCCC(NC1CCCCCC1)=O	-	2.3
GNP88	6.5	0	536	-	S1SC(CC1)CCCCC(NCCCCCCCCCCC)=O	0.55

## Sheet: Excel Table S6
Index	Size [nm]	#Ligand1	#Ligand2	Ligand1 SMILES	Ligand2 SMILES	Zeta potential in water [mv]
GNP1	5	310	0	O=C(NC1=CC=C(CC(NC(CC2CCCC2)=O)C(NCCCC)=O)C=C1)CCCCC3SSCC3	-	-25.6
GNP2	5	310	0	O=C(NC1=CC=C(CC(NC(CC(CC)C)=O)C(NC2CCCCC2)=O)C=C1)CCCCC3SSCC3	-	-33.3
GNP3	5	310	0	O=C(NC1=CC=C(CC(NC(CC2CCCC2)=O)C(NCCC3=CC=C(OC)C(OC)=C3)=O)C=C1)CCCCC4SSCC4	-	-28
GNP4	5	310	0	O=C(NC1=CC=C(CC(NC(CC2CCCC2)=O)C(NCC3=CC=C(OCO4)C4=C3)=O)C=C1)CCCCC5SSCC5	-	-36.1
GNP5	5	310	0	O=C(NC1=CC=C(CC(NC(CC2CCCC2)=O)C(NC(C3=CC=C(O)C=C3)C(OC)=O)=O)C=C1)CCCCC4SSCC4	-	-37.9
GNP6	5	310	0	O=C(NC1=CC=C(CC(NC(CC2CCCC2)=O)C(O)=O)C=C1)CCCCC3SSCC3	-	-37
GNP7	5	310	0	O=C(NC1=CC=C(CC(NC(CC2CCCC2)=O)C(OC)=O)C=C1)CCCCC3SSCC3	-	-25
GNP9	5	310	0	O=C(NC1=CC=C(CC(NC(C2=CC=CC=C2)=O)C(NCCCC)=O)C=C1)CCCCC3SSCC3	-	-31.9
GNP10	5	310	0	O=C(NC1=CC=C(CC(NC(C2=CC=CC=C2)=O)C(NC3CCCCC3)=O)C=C1)CCCCC4SSCC4	-	-34
GNP11	5	310	0	O=C(NC1=CC=C(CC(NC(C2=CC=CC=C2)=O)C(NCCC3=CC(OC)=C(OC)C=C3)=O)C=C1)CCCCC4SSCC4	-	-40.1
GNP12	5	310	0	O=C(NC1=CC=C(CC(NC(C2=CC=CC=C2)=O)C(NCC3=CC=C(OCO4)C4=C3)=O)C=C1)CCCCC5SSCC5	-	-31.3
GNP13	5	310	0	O=C(NC1=CC=C(CC(NC(C2=CC=CC=C2)=O)C(NC(C3=CC=C(O)C=C3)C(OC)=O)=O)C=C1)CCCCC4SSCC4	-	-34.9
GNP14	5	310	0	O=C(NC1=CC=C(CC(NC(C2=CC=CC=C2)=O)C(O)=O)C=C1)CCCCC3SSCC3	-	-42.4
GNP15	5	310	0	O=C(NC1=CC=C(CC(NC(C2=CC=CC=C2)=O)C(OC)=O)C=C1)CCCCC3SSCC3	-	-33.3
GNP17	5	310	0	O=C(NC1=CC=C(CC(NC(CC2=CC=CC=C2)=O)C(NCCCC)=O)C=C1)CCCCC3SSCC3	-	-40.2
GNP18	5	310	0	O=C(NC1=CC=C(CC(NC(CC2=CC=CC=C2)=O)C(NC3CCCCC3)=O)C=C1)CCCCC4SSCC4	-	-41.1
GNP19	5	310	0	O=C(NC1=CC=C(CC(NC(CC2=CC=CC=C2)=O)C(NCCC3=CC(OC)=C(OC)C=C3)=O)C=C1)CCCCC4SSCC4	-	-31.8
GNP20	5	310	0	O=C(NC1=CC=C(CC(NC(CC2=CC=CC=C2)=O)C(NCC3=CC=C(OCO4)C4=C3)=O)C=C1)CCCCC5SSCC5	-	-23.7
GNP21	5	310	0	O=C(NC1=CC=C(CC(NC(CC2=CC=CC=C2)=O)C(NC(C3=CC=C(O)C=C3)C(OC)=O)=O)C=C1)CCCCC4SSCC4	-	-38.2
GNP22	5	310	0	O=C(NC1=CC=C(CC(NC(CC2=CC=CC=C2)=O)C(O)=O)C=C1)CCCCC3SSCC3	-	-41.8
GNP23	5	310	0	O=C(NC1=CC=C(CC(NC(CC2=CC=CC=C2)=O)C(OC)=O)C=C1)CCCCC3SSCC3	-	-40.2
GNP25	5	310	0	O=C(NC1=CC=C(CC(NC(CCC=C)=O)C(NCCCC)=O)C=C1)CCCCC2SSCC2	-	-40.5
GNP26	5	310	0	O=C(NC1=CC=C(CC(NC(CCC=C)=O)C(NC2CCCCC2)=O)C=C1)CCCCC3SSCC3	-	-36
GNP27	5	310	0	O=C(NC1=CC=C(CC(NC(CCC=C)=O)C(NCCC2=CC(OC)=C(OC)C=C2)=O)C=C1)CCCCC3SSCC3	-	-34.6
GNP28	5	310	0	O=C(NC1=CC=C(CC(NC(CCC=C)=O)C(NCC2=CC(OCO3)=C3C=C2)=O)C=C1)CCCCC4SSCC4	-	-34.7
GNP29	5	310	0	O=C(NC1=CC=C(CC(NC(CCC=C)=O)C(NC(C2=CC=C(O)C=C2)C(OC)=O)=O)C=C1)CCCCC3SSCC3	-	-38
GNP30	5	310	0	O=C(NC1=CC=C(CC(NC(CCC=C)=O)C(O)=O)C=C1)CCCCC2SSCC2	-	-49.4
GNP31	5	310	0	O=C(NC1=CC=C(CC(NC(CCC=C)=O)C(OC)=O)C=C1)CCCCC2SSCC2	-	-26.4
GNP33	5	310	0	O=C(NC1=CC=C(CC(NC(C2=CC=C(Cl)C=C2)=O)C(NCCCC)=O)C=C1)CCCCC3SSCC3	-	-48.3
GNP34	5	310	0	O=C(NC1=CC=C(CC(NC(C2=CC=C(Cl)C=C2)=O)C(NC3CCCCC3)=O)C=C1)CCCCC4SSCC4	-	-40.2
GNP35	5	310	0	O=C(NC1=CC=C(CC(NC(C2=CC=C(Cl)C=C2)=O)C(NCCC3=CC=C(OC)C(OC)=C3)=O)C=C1)CCCCC4SSCC4	-	-42.2
GNP36	5	310	0	O=C(NC1=CC=C(CC(NC(C2=CC=C(Cl)C=C2)=O)C(NCC3=CC=C(OCO4)C4=C3)=O)C=C1)CCCCC5SSCC5	-	-37.3
GNP37	5	310	0	O=C(NC1=CC=C(CC(NC(C2=CC=C(Cl)C=C2)=O)C(NC(C3=CC=C(O)C=C3)C(OC)=O)=O)C=C1)CCCCC4SSCC4	-	-49.3
GNP38	5	310	0	O=C(NC1=CC=C(CC(NC(C2=CC=C(Cl)C=C2)=O)C(O)=O)C=C1)CCCCC3SSCC3	-	-43.7
GNP39	5	310	0	O=C(NC1=CC=C(CC(NC(C2=CC=C(Cl)C=C2)=O)C(OC)=O)C=C1)CCCCC3SSCC3	-	-34.5
GNP41	5	310	0	O=C(NC1=CC=C(CC(NS(=O)(C2=CC=C(C)C=C2)=O)C(NCCCC)=O)C=C1)CCCCC3SSCC3	-	-35.9
GNP42	5	310	0	O=C(NC1=CC=C(CC(NS(=O)(C2=CC=C(C)C=C2)=O)C(NC3CCCCC3)=O)C=C1)CCCCC4SSCC4	-	-40.9
GNP43	5	310	0	O=C(NC1=CC=C(CC(NS(=O)(C2=CC=C(C)C=C2)=O)C(NCCC3=CC(OC)=C(OC)C=C3)=O)C=C1)CCCCC4SSCC4	-	-45.8
GNP44	5	310	0	O=C(NC1=CC=C(CC(NS(=O)(C2=CC=C(C)C=C2)=O)C(NCC3=CC=C(OCO4)C4=C3)=O)C=C1)CCCCC5SSCC5	-	-40.8
GNP45	5	310	0	O=C(NC1=CC=C(CC(NS(=O)(C2=CC=C(C)C=C2)=O)C(NC(C3=CC=C(O)C=C3)C(OC)=O)=O)C=C1)CCCCC4SSCC4	-	-43.7
GNP46	5	310	0	O=C(NC1=CC=C(CC(NS(=O)(C2=CC=C(C)C=C2)=O)C(O)=O)C=C1)CCCCC3SSCC3	-	-32.8
GNP47	5	310	0	O=C(NC1=CC=C(CC(NS(=O)(C2=CC=C(C)C=C2)=O)C(OC)=O)C=C1)CCCCC3SSCC3	-	-38.9
GNP48	7.3	459	0	S1SC(CC1)CCCCC(NCCOCCOCCO)=O	-	-13.1
GNP49	6.8	346	40	S1SC(CC1)CCCCC(NCCOCCOCCO)=O	S1SC(CC1)CCCCC(NCCCCCCCCCCC)=O	-10
GNP50	8.5	311	107	S1SC(CC1)CCCCC(NCCOCCOCCO)=O	S1SC(CC1)CCCCC(NCCCCCCCCCCC)=O	-10.3
GNP51	8	240	251	S1SC(CC1)CCCCC(NCCOCCOCCO)=O	S1SC(CC1)CCCCC(NCCCCCCCCCCC)=O	-14.1
GNP52	7.5	147	390	S1SC(CC1)CCCCC(NCCOCCOCCO)=O	S1SC(CC1)CCCCC(NCCCCCCCCCCC)=O	-17.5
GNP53	8	86	477	S1SC(CC1)CCCCC(NCCOCCOCCO)=O	S1SC(CC1)CCCCC(NCCCCCCCCCCC)=O	-20.7
GNP54	6.7	0	727	-	S1SC(CC1)CCCCC(NCCCCCCCCCCC)=O	-21.1
GNP55	5.8	0	232	-	S1SC(CC1)CCCCC(N)=O	-7.2
GNP56	5.8	21	116	S1SC(CC1)CCCCC(NCCCN)=O	S1SC(CC1)CCCCC(N)=O	39.4
GNP57	5.8	31	101	S1SC(CC1)CCCCC(NCCCN)=O	S1SC(CC1)CCCCC(N)=O	42.9
GNP58	5.8	82	75	S1SC(CC1)CCCCC(NCCCN)=O	S1SC(CC1)CCCCC(N)=O	47.6
GNP59	5.8	144	0	S1SC(CC1)CCCCC(NCCCN)=O	-	65.3
GNP60	5.8	31	201	S1SC(CC1)CCCCC(O)=O	S1SC(CC1)CCCCC(N)=O	-30.7
GNP61	5.8	124	108	S1SC(CC1)CCCCC(O)=O	S1SC(CC1)CCCCC(N)=O	-33.9
GNP62	5.8	170	62	S1SC(CC1)CCCCC(O)=O	S1SC(CC1)CCCCC(N)=O	-38.8
GNP63	5.8	287	0	S1SC(CC1)CCCCC(O)=O	-	-41.5
GNP64	6.9	67	676	S1SC(CC1)CCCCC(NCCOCCOCCOCCOC)=O	S1SC(CC1)CCCCC(N)=O	-25.1
GNP65	6.6	158	472	S1SC(CC1)CCCCC(NCCOCCOCCOCCOC)=O	S1SC(CC1)CCCCC(N)=O	-25.3
GNP66	6.4	268	327	S1SC(CC1)CCCCC(NCCOCCOCCOCCOC)=O	S1SC(CC1)CCCCC(N)=O	-17.8
GNP67	6.5	720	0	S1SC(CC1)CCCCC(NCCOCCOCCOCCOC)=O	S1SC(CC1)CCCCC(N)=O	-11.3
GNP68	4.9	92	673	S1SC(CC1)CCCCC(NCC(C(C(C(O)O)O)O)O)=O	S1SC(CC1)CCCCC(N)=O	-13
GNP69	5	226	502	S1SC(CC1)CCCCC(NCC(C(C(C(O)O)O)O)O)=O	S1SC(CC1)CCCCC(N)=O	-4
GNP70	5.7	542	221	S1SC(CC1)CCCCC(NCC(C(C(C(O)O)O)O)O)=O	S1SC(CC1)CCCCC(N)=O	-11.6
GNP71	8	810	0	S1SC(CC1)CCCCC(NCC(C(C(C(O)O)O)O)O)=O	-	-15.8
GNP72	7.3	0	869	-	S1SC(CC1)CCCCC(NC1CCCCC1)=O	-24.4
GNP73	7.3	174	695	S1SC(CC1)CCCCC(Nc1ccccc1)=O	S1SC(CC1)CCCCC(NC1CCCCC1)=O	-27.9
GNP74	7.3	521	348	S1SC(CC1)CCCCC(Nc1ccccc1)=O	S1SC(CC1)CCCCC(NC1CCCCC1)=O	-22
GNP75	7.3	695	174	S1SC(CC1)CCCCC(Nc1ccccc1)=O	S1SC(CC1)CCCCC(NC1CCCCC1)=O	-22.5
GNP76	7.3	869	0	S1SC(CC1)CCCCC(Nc1ccccc1)=O	-	-23
GNP77	5.9	795	0	S1SC(CC1)CCCCC(NC(C(C)(C)C)C)=O	-	-8
GNP78	5.9	682	0	S1SC(CC1)CCCCC(N(CCC)CCC)=O	-	-8.5
GNP79	5.9	830	0	S1SC(CC1)CCCCC(NC(CC(C)C)C)=O	-	-7.4
GNP80	5.9	698	0	S1SC(CC1)CCCCC(NCCCCCC)=O	-	-12.4
GNP81	5.9	703	0	S1SC(CC1)CCCCC(NC12CC3CC(CC(C3)C1)C2)=O	-	-5.7
GNP82	5.8	42	102	S1SC(CC1)CCCCC(NCCCN)=O	S1SC(CC1)CCCCC(N)=O	48.7
GNP83	5.8	47	185	S1SC(CC1)CCCCC(O)=O	S1SC(CC1)CCCCC(N)=O	-43.6
GNP84	5.2	380	126	S1SC(CC1)CCCCC(NCCOCCOCCOCCOC)=O	S1SC(CC1)CCCCC(N)=O	-17.3
GNP85	5	235	275	S1SC(CC1)CCCCC(NCC(C(C(C(O)O)O)O)O)=O	S1SC(CC1)CCCCC(N)=O	-5.1
GNP86	7.3	348	521	S1SC(CC1)CCCCC(Nc1ccccc1)=O	S1SC(CC1)CCCCC(NC1CCCCC1)=O	-18.7
GNP87	5.9	869	0	S1SC(CC1)CCCCC(NC1CCCCCC1)=O	-	-6.2
GNP88	6.5	0	536	-	S1SC(CC1)CCCCC(NCCCCCCCCCCC)=O	-16.3

## Sheet: Excel Table S7
Index	Size [nm]	#Ligand1	#Ligand2	Ligand1 SMILES	Ligand2 SMILES	Zeta potential in phosphate buffer [mv]
GNP119	2	80	0	SCCCCCCCCCCCOCCOCCOCCOCC[N+](C)(CCCCCC)C	-	21
GNP120	2.2	80	0	SCCCCCCCCCCCOCCOCCOCCOCC[N+](C)(CC)C	-	26
GNP121	1.9	80	0	SCCCCCCCCCCCOCCOCCOCCOCC[N+](C)(CCCCCCCCCC)C	-	24
GNP122	1.9	80	0	SCCCCCCCCCCC[N+](C)(C)C	-	22
GNP123	2.2	80	0	O=C(OCCOCCOCCOCC[N+](C)(C)C)CCCCC1SSCC1	-	24
GNP124	2.15	80	0	SCCCCCCCCCCCOCCOCCOCCOCC[N+](CCCCCC)(C)C	-	22.3
GNP125	2.09	80	0	SCCCCCCCCCCCOCCOCCOCCOCC[N+](C1CCCCC1)(C)C	-	21.2
GNP126	2.12	80	0	SCCCCCCCCCCCOCCOCCOCCOCC[N+](CC1=CC=CC=C1)(C)C	-	20.13
GNP127	2.14	80	0	SCCCCCCCCCCCOCCOCCOCCOCC[N+](CCCO)(C)C	-	20.1
GNP128	2.1	80	0	SCCCCCCCCCCCOCCOCCOCCOCC[N+](C1CCC(CC1)C2=CC=CC=C2)(C)C	-	22.53
GNP129	2.11	80	0	SCCCCCCCCCCCOCCOCCOCCOCC[N+](CCOC(C1=CC=CC=C1)C2=CC=CC=C2)(C)C	-	25.17
GNP130	2	80	0	SCCCCCCCCCCCOCCOCCOCCOCC[N+](CCCS(=O)([O-])=O)(C)C	-	-6.8
GNP131	2	80	0	SCCCCCCCCCCCOCCOCCOCCOCC[N+](CCCS(=O)([O-])=O)(C)CCCC	-	-7.7
GNP132	2	80	0	SCCCCCCCCCCCOCCOCCOCCOCC[N+](CCCS(=O)([O-])=O)(C)CCCCCC	-	-2.9
GNP133	2	80	0	SCCCCCCCCCCCOCCOCCOCCOCC[N+](CCCS(=O)([O-])=O)(CCCC)CCCC	-	-5.6
GNP134	2	80	0	SCCCCCCCCCCCOCCOCCOCCOCC[N+](CCCS(=O)([O-])=O)(CCCCC)CCCC	-	-5.4
GNP135	2	80	0	SCCCCCCCCCCCOCCOCCOCCOCCO	-	-0.9
GNP136	2	80	0	SCCCCCCCCCCCOCCOCCOCCOCC[N+](C)(C)C	-	16.9
GNP137	2	80	0	SCCCCCCCCCCCOCCOCCOCCOCCOCC([O-])=O	-	-28.2
GNP138	2	80	0	SCCCCCCCCCCCOCCOCCOCCOCCO	-	-1.1
GNP139	2	80	0	SCCCCCCCCCCCOCCOCCOCCOCC[N+](C)(C)C	-	24.4
GNP140	2	80	0	SCCCCCCCCCCCOCCOCCOCCOCCOCC([O-])=O	-	-37.9
GNP141	2	80	0	SCCCCCCCCCCCOCCOCCOCCOCC[N+](CCCS(=O)([O-])=O)(C)C	-	-2
GNP142	2	80	0	SCCCCCCCCCCCOCCOCCOCCOCC[N+](C)(C)C	-	15.6
GNP143	2	80	0	SCCCCCCCCCCCOCCOCCOCCOCC[N+](C)(CCCO)C	-	19.82
GNP144	2	80	0	SCCCCCCCCCCCOCCOCCOCCOCC[N+](C)(CCCN)C	-	14.76
GNP145	2	80	0	SCCCCCCCCCCCOCCOCCOCCOCC[N+](C)(C1=CC=CC=C1)C	-	25.17
GNP146	2	80	0	SCCCCCCCCCCCOCCOCCOCCOCC[N+](CCCCCC)(C)C	-	21.23
GNP147	2	80	0	SCCCCCCCCCCCOCCOCCOCCOCC[N+](C1CCCCC1)(C)C	-	20.56
GNP148	2	80	0	SCCCCCCCCCCCOCCOCCOCCOCC[N+]([C@@H]1CC[C@@H](C2=CC=CC=C2)CC1)(C)C	-	20.61
GNP149	2	80	0	SCCCCCCCCCCCOCCOCCOCCOCC[N+]([C@@H]1CC[C@@H](C(C)(C)C)CC1)(C)C	-	18.28
GNP150	2	80	0	SCCCCCCCCCCCOCCOCCOCCOCCO	-	0.1
GNP151	2	80	0	SCCCCCCCCCCCOCCOCCOCCOCC[N+](C)(C)C	-	15.2
GNP152	2	80	0	SCCCCCCCCCCCOCCOCCOCCOCC[N+](C)(CCCC)C	-	17.8
GNP153	2	80	0	SCCCCCCCCCCCOCCOCCOCCOCC[N+](C)(C1CCCCC1)C	-	21.7
GNP154	2	80	0	SCCCCCCCCCCCOCCOCCOCCOCC[N+](C)(CCCCCC)C	-	19.7
GNP155	2	80	0	SCCCCCCCCCCCOCCOCCOCCOCC[N+](CCCC)(CCCC)C	-	24.9
GNP156	2	80	0	SCCCCCCCCCCCOCCOCCOCCOCC[N+](C)(CCCCCCCC)C	-	18.2
GNP157	2	80	0	SCCCCCCCCCCCOCCOCCOCCOCC[N+](C)(C)C	-	21.1
GNP158	2	80	0	SCCCCCCCCCCCOCCOCCOCCOCC[N+](C)(CCCCCC)C	-	16.6
GNP159	2	80	0	SCCCCCCCCCCCOCCOCCOCCOCCO	-	-0.8
GNP160	2	80	0	SCCCCCCCCCCCOCCOCCOCCOCCC([O-])=O	-	-41.2
GNP161	2.5	80	0	SCCCCCCCCCCCOCCOCCOCCOCCO	-	1.2
GNP162	2.7	64	16	SCCCCCCCCCCCOCCOCCOCCOCCO	SCCCCCCCCCCCOCCOCCOCCOCC[N+](C)(C)C	24.6
GNP163	2.6	28	52	SCCCCCCCCCCCOCCOCCOCCOCCO	SCCCCCCCCCCCOCCOCCOCCOCC[N+](C)(C)C	27.6
GNP164	2.5	3	77	SCCCCCCCCCCCOCCOCCOCCOCCO	SCCCCCCCCCCCOCCOCCOCCOCC[N+](C)(C)C	25.3
GNP165	2.4	0	80	-	SCCCCCCCCCCCOCCOCCOCCOCC[N+](C)(C)C	26.6
GNP166	2	77	0	SCCCCCCCCCCCOCCOCCOCCOCC[N+](C)(C)C	-	18.2
GNP167	4	240	0	SCCCCCCCCCCCOCCOCCOCCOCC[N+](C)(C)C	-	19.3
GNP168	6	531	0	SCCCCCCCCCCCOCCOCCOCCOCC[N+](C)(C)C	-	17.5
GNP169	2	72	0	SCCCCCCCCCCCOCCOCCOCCOCCOCC([N-]S(=O)(CCC[N+](C)(C)C)=O)=O	-	-3.6
GNP170	4	231	0	SCCCCCCCCCCCOCCOCCOCCOCCOCC([N-]S(=O)(CCC[N+](C)(C)C)=O)=O	-	-4.8
GNP171	6	520	0	SCCCCCCCCCCCOCCOCCOCCOCCOCC([N-]S(=O)(CCC[N+](C)(C)C)=O)=O	-	-6.1
GNP172	2	79	0	SCCCCCCCCCCCOCCOCCOCCOCC[N+](CCCS(=O)([O-])=O)(C)C	-	-3.7
GNP173	4	244	0	SCCCCCCCCCCCOCCOCCOCCOCC[N+](CCCS(=O)([O-])=O)(C)C	-	-7.9
GNP174	6	543	0	SCCCCCCCCCCCOCCOCCOCCOCC[N+](CCCS(=O)([O-])=O)(C)C	-	-10
GNP175	2	63	0	SCCCCCCCCCCCOCCOCCOCCOCCOCC(O)=O	-	-41.2
GNP176	4	246	0	SCCCCCCCCCCCOCCOCCOCCOCCOCC(O)=O	-	-42.8
GNP177	6	511	0	SCCCCCCCCCCCOCCOCCOCCOCCOCC(O)=O	-	-44.6
GNP178	2	80	0	SCCCCCCCCCCCOCCOCCOCCOCC[N+](C)(CC)C	-	24.1
GNP179	2	80	0	SCCCCCCCCCCCOCCOCCOCCOCC[N+](C)(CCC)C	-	25
GNP180	2	80	0	SCCCCCCCCCCCOCCOCCOCCOCC[N+](C)(CCCCC)C	-	33.6
GNP181	2	80	0	SCCCCCCCCCCCOCCOCCOCCOCC[N+](C)(CCCCCCC)C	-	20.2
GNP182	2	80	0	SCCCCCCCCCCCOCCOCCOCCOCCOCC(NCC(O)=O)=O	-	-25.8
GNP183	2	80	0	SCCCCCCCCCCCOCCOCCOCCOCCOCC(NC(C)C(O)=O)=O	-	-24.7
GNP184	2	80	0	SCCCCCCCCCCCOCCOCCOCCOCCOCC(NC(CC(N)=O)C(O)=O)=O	-	-26.2
GNP185	2	80	0	SCCCCCCCCCCCOCCOCCOCCOCCOCC(NC(CC(O)=O)C(O)=O)=O	-	-32.5
GNP186	2	80	0	SCCCCCCCCCCCOCCOCCOCCOCCOCC(NC(CCC(N)=O)C(O)=O)=O	-	-23.5
GNP187	2	80	0	SCCCCCCCCCCCOCCOCCOCCOCCOCC(NC(CCC(O)=O)C(O)=O)=O	-	-32.2
GNP188	2	80	0	SCCCCCCCCCCCOCCOCCOCCOCCOCC(NC(CC(C)C)C(O)=O)=O	-	-25.6
GNP189	2	80	0	SCCCCCCCCCCCOCCOCCOCCOCCOCC(NC(CCSC)C(O)=O)=O	-	-25.4
GNP190	2	80	0	SCCCCCCCCCCCOCCOCCOCCOCCOCC(NC(CC1=CC=CC=C1)C(O)=O)=O	-	-25.7
GNP191	2	80	0	SCCCCCCCCCCCOCCOCCOCCOCCOCC(NC(C(C)C)C(O)=O)=O	-	-26.4

## Sheet: Excel Table S8
	SSSS	SSSC	SSSN	SSSO	SSSX	SSSM	SSCC	SSCN	SSCO	SSCX	SSCM	SSNN	SSNO	SSNX	SSNM	SSOO	SSOX	SSOM	SSXX	SSXM	SSMM	SCCC	SCCN	SCCO	SCCX	SCCM	SCNN	SCNO	SCNX	SCNM	SCOO	SCOX	SCOM	SCXX	SCXM	SCMM	SNNN	SNNO	SNNX	SNNM	SNOO	SNOX	SNOM	SNXX	SNXM	SNMM	SOOO	SOOX	SOOM
GNP1	0.00384	0.96806	0	0.00107	0	1.161	24.4314	0.3328	1.2744	0	41.9244	0.0088	0.02508	0	0.15066	0.03776	0	0.57424	0	0	39.4174	176.804	12.536	22.672	0	240.059	0.4662	3.15905	0	5.18974	0.93534	0	13.7278	0	0	213.848	0	0.0605	0	0.058	0.07875	0	0.35672	0	0	0.68226	0.01935	0	0.2808
GNP2	0.00192	0.92441	0.00206	0.00107	0	1.29946	24.6058	0.37128	0.85644	0	44.6084	0	0.01482	0	0.22134	0.02832	0	0.37733	0	0	40.0657	167.032	14.1509	24.1108	0	242.58	0.33966	2.85315	0	5.90696	1.16382	0	13.3868	0	0	218.19	0	0.02057	0	0.007	0.0525	0	0.37752	0	0	0.86237	0.01806	0	0.26244
GNP3	0	0.58297	0	0	0	0.7353	22.9545	0.51896	0.27	0	45.4636	0	0.01368	0	0.2604	0	0	0.10573	0	0	40.2724	168.789	8.64675	13.4953	0	234.1	0.28971	1.3363	0	5.48678	0.32963	0	9.22474	0	0	217.199	0	0	0	0.035	0.00125	0	0.1404	0	0	1.577	0.00258	0	0.14256
GNP4	0	0.94672	0	0	0	0.83334	22.9957	0.21736	0.32292	0	42.8945	0	0	0	0.04743	0.01888	0	0.46463	0	0	40.986	158.654	7.644	15.7385	0	233.047	0.11322	1.3892	0	4.2112	0.63784	0	10.3194	0	0	215.588	0	0.0121	0	0.018	0.00625	0	0.18616	0	0	0.6474	0.00258	0	0.22788
GNP5	0.02496	0.57327	0	0.00321	0	0.70692	25.2683	0.28808	0.6318	0	44.176	0	0	0	0.09486	0	0	0.44911	0	0	35.2594	202.299	13.1271	24.3702	0	246.777	0.13431	1.6238	0	4.71034	0.58548	0	15.435	0	0	220.434	0	0	0	0.011	0.0175	0	0.17888	0	0	0.84245	0	0	0.1566
GNP6	0	0.61983	0	0	0	0.82474	21.8942	0.14248	0.57348	0	44.3326	0.0088	0.00912	0	0.05301	0.00944	0	0.37442	0	0	41.9702	149.125	6.2748	15.5412	0	231.292	0.09879	1.5134	0	3.60678	0.86156	0	10.0636	0	0	206.099	0	0.00484	0	0.009	0.0225	0	0.14352	0	0	0.42994	0.00387	0	0.33588
GNP7	0.0096	0.78473	0.00103	0	0	1.06296	24.1345	0.38792	0.65664	0	41.0109	0	0.03534	0	0.14043	0.00354	0	0.4656	0	0	34.8984	164.687	13.2531	25.4711	0	238.719	0.4107	3.06245	0	5.69922	1.9397	0	13.9493	0	0	217.251	0	0.00968	0	0.082	0.0925	0	0.31408	0	0	0.90968	0.00645	0	0.43632
GNP8	0.00192	0.74787	0	0.00428	0	0.68972	24.4461	0.17576	0.96768	0	43.9994	0	0	0	0.12927	0	0	0.65475	0	0	36.9641	189.118	9.11925	26.3126	0	236.091	0.09657	1.3018	0	7.00488	0.73542	0	16.6776	0	0	217.19	0	0.00847	0	0.006	0.01875	0	0.24024	0	0	1.10307	0.01548	0	0.2322
GNP9	0	0.65572	0	0.00321	0	0.51944	25.5682	0.32344	0.61236	0	43.4661	0.0044	0	0	0.23343	0	0	0.51701	0	0	32.0956	197.512	16.4388	22.1063	0	241.85	0.1776	2.139	0	11.3251	0.7497	0	14.0375	0	0	229.042	0	0.00121	0	0.061	0.00375	0	0.40352	0	0	2.17875	0	0	0.1512
GNP10	0.00768	0.44814	0	0.00107	0	0.4343	25.3928	0.21008	0.69876	0	44.1595	0	0.02508	0	0.12741	0.00354	0	0.51313	0	0	31.6122	217.867	18.7247	27.8124	0	260.431	0.29526	3.5466	0	9.07946	1.53034	0	14.2316	0	0	238.019	0	0.01452	0	0.029	0.03875	0	0.416	0	0	2.24432	0.01419	0	0.33372
GNP11	0.00768	0.40837	0	0	0	0.59684	25.8514	0.41912	1.20852	0	45.0121	0	0.0228	0	0.2883	0.0413	0	0.79928	0	0	29.5085	221.984	22.9246	34.5203	0	263.428	0.64602	5.04965	0	11.1587	1.83141	0	17.9595	0	0	242.154	0	0.09075	0	0.164	0.075	0	0.45344	0	0	2.48336	0.01677	0	0.28188
GNP12	0	0.78085	0	0.00321	0	0.5805	26.7854	0.72488	2.0844	0	39.9069	0	0.01824	0	0.32457	0.05192	0	1.09028	0	0	24.1893	227.032	28.77	51.509	0	284.364	0.91464	8.49275	0	18.6515	3.49027	0	30.0958	0	0	240.718	0	0.03993	0	0.233	0.21	0	1.47264	0	0	2.5398	0.05934	0	0.8262
GNP13	0.01152	0.48985	0	0	0	0.38528	21.072	0.0988	0.61884	0	43.8123	0	0.00114	0	0.10974	0.00708	0	0.40643	0	0	39.9517	195.508	9.0321	24.8193	0	239.281	0.29637	1.71465	0	6.0912	0.77469	0	15.8103	0	0	215.937	0	0.00121	0	0.027	0.02	0	0.14144	0	0	0.95035	0.00516	0	0.19116
GNP14	0	0.49955	0	0	0	0.52202	25.2497	0.1352	1.2852	0	43.5244	0	0	0	0.07626	0.05428	0	1.13684	0	0	30.6652	195.783	13.2625	41.2031	0	247.046	0.10101	3.94105	0	7.99188	4.81117	0	23.2162	0	0	232.214	0	0	0	0.025	0.07875	0	0.51896	0	0	1.56206	0.21672	0	1.27116
GNP15	0	0.51604	0	0.00856	0	0.8428	20.5055	0.08424	0.53568	0	45.5271	0	0.00684	0	0.02046	0.03068	0	0.37442	0	0	42.1876	141.115	5.775	17.2024	0	227.567	0.08436	2.4472	0	2.5521	1.34113	0	9.2806	0	0	208.987	0	0	0	0.003	0.0275	0	0.09464	0	0	0.29963	0.01548	0	0.26676
GNP16	0.00288	0.82159	0.00721	0.00642	0	1.21776	24.6646	0.338	1.404	0	39.7686	0	0.0057	0	0.27342	0.059	0	0.86718	0	0	34.2874	175.018	12.998	32.8155	0	245.681	0.21423	3.6754	0	6.52642	2.63466	0	20.2448	0	0	213.273	0	0.01694	0	0.019	0.15125	0	0.39104	0	0	0.99932	0.1032	0	0.62748
GNP17	0	0.89725	0.00721	0.01284	0	1.06382	25.1772	0.40456	1.07784	0	40.3454	0.0165	0.00228	0	0.18414	0.01062	0	0.61207	0	0	37.9696	179.146	14.5499	26.9993	0	246.882	0.40737	2.8543	0	4.70188	1.13645	0	14.1669	0	0	216.764	0.03159	0.03267	0	0.07	0.05875	0	0.32448	0	0	0.69471	0.00387	0	0.2916
GNP18	0.01536	0.53253	0	0.00428	0	0.47644	22.4057	0.32136	0.28512	0	45.5784	0.0066	0.00684	0	0.12183	0	0	0.17654	0	0	37.7766	167.046	6.43125	12.0107	0	228.408	0.18981	0.8326	0	3.77504	0.58548	0	7.8498	0	0	217.437	0	0	0	0.049	0.00875	0	0.07384	0	0	0.73704	0.00258	0	0.11556
GNP19	0.01728	0.68773	0	0	0	0.8643	22.5439	0.43472	0.17712	0	45.9412	0	0.00342	0	0.13206	0	0	0.09797	0	0	40.0193	176.722	9.4458	12.7105	0	237.299	0.13875	1.39265	0	4.68966	0.30464	0	7.59206	0	0	217.639	0	0	0	0.045	0.01375	0	0.0676	0	0	1.11303	0	0	0.11448
GNP20	0.00096	0.92635	0.00103	0	0	1.0578	24.9949	0.24336	0.77436	0	43.6592	0	0.00912	0	0.08742	0.03186	0	0.42389	0	0	41.7704	169.214	11.7421	23.0557	0	239.587	0.13986	2.5783	0	4.5919	1.23046	0	13.9973	0	0	215.304	0	0.02662	0	0.038	0.0875	0	0.26312	0	0	0.50298	0.02838	0	0.25704
GNP21	0.01344	0.82838	0	0.00749	0	0.70004	25.5829	0.46488	1.84356	0	43.092	0	0.0228	0	0.16089	0.02006	0	0.98455	0	0	31.388	215.97	24.57	37.9113	0	259.102	0.37074	5.04965	0	10.2939	2.975	0	20.5428	0	0	230.609	0	0.02057	0	0.076	0.11	0	1.19496	0	0	1.45167	0.06063	0	0.71388
GNP22	0	0.81965	0.00927	0.00214	0	1.1008	23.6503	0.37024	0.42768	0	45.7481	0	0	0	0.08835	0.00236	0	0.26966	0	0	40.4533	169.588	10.9085	18.4537	0	240.661	0.35742	2.00215	0	6.19084	0.68782	0	12.7439	0	0	209.42	0	0.00968	0	0.044	0.00375	0	0.23816	0	0	0.7221	0	0	0.20844
GNP23	0.02016	0.91762	0.00103	0.00642	0	1.43964	24.7509	0.32864	0.86724	0	42.523	0	0.01368	0	0.09858	0.02832	0	0.5141	0	0	37.7264	163.424	12.5832	22.8889	0	233.129	0.17427	3.48105	0	4.82596	1.69575	0	12.935	0	0	216.877	0	0.01573	0	0.045	0.115	0	0.30368	0	0	0.89474	0.03225	0	0.51084
GNP24	0	0.68773	0	0.00321	0	0.3827	24.1433	0.24856	0.70632	0	41.325	0	0.01824	0	0.11811	0.0354	0	0.41322	0	0	34.2676	190.28	13.6689	24.9479	0	241.163	0.31524	2.3851	0	6.1711	1.13764	0	15.2831	0	0	217.837	0	0.00847	0	0.003	0.07	0	0.30576	0	0	1.29231	0.02451	0	0.26352
GNP25	0	0.40934	0	0	0	0.60888	24.795	0.51168	1.74312	0	42.5099	0	0.07182	0	0.57381	0.00236	0	0.80704	0	0	26.6395	214.049	21.8484	39.4471	0	267.285	0.66378	6.1571	0	11.8844	1.97302	0	21.1974	0	0	249.571	0	0.08228	0	0.187	0.14	0	0.96824	0	0	2.87263	0.03096	0	0.39744
GNP26	0.01536	1.0864	0.00309	0.00535	0	1.1481	25.7397	0.58968	1.1556	0	45.5454	0.0099	0.02052	0	0.24831	0.06018	0	0.77988	0	0	34.4812	169.167	18.8906	27.3699	0	245.734	0.55944	4.5402	0	8.07272	1.62197	0	15.6614	0	0	221.768	0	0.02299	0	0.014	0.065	0	0.6396	0	0	1.20599	0.00774	0	0.53568
GNP27	0	0.55969	0.00103	0	0	0.73444	21.9687	0.18096	0.33156	0	43.7384	0	0.00228	0	0.10137	0.00354	0	0.17169	0	0	42.4164	156.462	7.4466	14.4196	0	230.398	0.26529	1.7549	0	3.65754	0.96985	0	7.65968	0	0	215.928	0	0.00726	0	0.005	0.00375	0	0.16224	0	0	0.78269	0.00774	0	0.2106
GNP28	0	0.58879	0	0	0	0.59684	23.9296	0.7176	0.38016	0	44.9312	0	0.01026	0	0.16833	0.01888	0	0.32883	0	0	36.9208	184.492	17.4972	18.1071	0	247.955	0.64824	2.04585	0	8.20056	0.61761	0	10.8457	0	0	225.062	0	0.00847	0	0.066	0.00375	0	0.16328	0	0	2.04263	0.00387	0	0.2376
GNP29	0.01344	0.75854	0	0.0107	0	0.95116	24.6568	0.74568	0.8694	0	44.7537	0	0.02508	0	0.34875	0.01062	0	0.52089	0	0	35.5338	169.262	20.1705	23.4764	0	246.46	0.25308	3.1441	0	9.16218	1.2852	0	12.6538	0	0	219.566	0	0.00484	0	0.082	0.0725	0	0.38584	0	0	2.08745	0.02709	0	0.23544
GNP30	0	0.97776	0	0	0	0.85226	22.6155	0.34528	0.2106	0	44.6014	0	0	0	0.05673	0	0	0.2134	0	0	40.4563	153.529	5.9073	9.04264	0	225.209	0.2331	0.7682	0	3.05124	0.26656	0	7.08638	0	0	215.145	0	0	0	0.034	0	0	0.1456	0	0	0.63827	0	0	0.06912
GNP31	0	0.71586	0	0	0	0.80324	21.6364	0.28392	0.23652	0	46.2362	0	0	0	0.03906	0	0	0.2619	0	0	41.4337	158.605	6.45855	10.3921	0	226.921	0.15207	1.42485	0	3.21574	0.34629	0	7.30884	0	0	213.556	0	0.00484	0	0.021	0.02125	0	0.1612	0	0	0.92877	0	0	0.10908
GNP32	0.00384	1.04954	0.00206	0.00535	0	1.2384	25.5339	0.57304	1.1394	0	45.0991	0	0.02394	0	0.23157	0.02124	0	0.65087	0	0	37.7142	166.828	16.8557	29.7995	0	246.128	0.36408	4.82425	0	7.82832	2.19793	0	17.7929	0	0	217.456	0	0.03388	0	0.012	0.08125	0	0.494	0	0	1.17943	0.03225	0	0.44388
GNP33	0	0.5238	0	0.00428	0	0.60028	25.2115	0.30368	0.56916	0	43.4869	0	0	0	0.14136	0	0	0.54417	0	0	32.1503	196.317	16.3338	21.6463	0	240.538	0.08658	2.1919	0	11.8844	0.78064	0	13.9581	0	0	225.661	0	0	0	0.014	0.02	0	0.51688	0	0	2.04844	0.00258	0	0.12636
GNP34	0.02112	0.49664	0.00618	0.00321	0	0.65102	27.7301	0.4368	1.4904	0	44.8798	0.0044	0.02394	0	0.14787	0	0	0.70034	0	0	28.4916	210.603	17.6285	34.7056	0	261.039	0.27972	4.301	0	8.9347	1.69932	0	15.8172	0	0	238.916	0	0.01331	0	0.044	0.0225	0	0.45552	0	0	1.68158	0.00903	0	0.20088
GNP35	0	0.31137	0.00721	0.00321	0	0.62436	23.9218	0.53872	1.269	0	42.1202	0.0033	0.01938	0	0.32736	0.00354	0	0.68579	0	0	29.3778	210.603	21.0052	28.7302	0	253.529	0.61605	5.28885	0	10.1999	1.74216	0	14.1767	0	0	239.069	0.01521	0.03751	0	0.249	0.0375	0	0.43576	0	0	1.99864	0.01032	0	0.29484
GNP36	0	0.84972	0	0.00963	0	0.82302	25.4927	0.6864	2.03688	0	38.762	0.0165	0.07866	0	0.48453	0.02596	0	1.20862	0	0	21.9974	206.209	32.3285	53.5146	0	278.671	1.14663	10.9077	0	19.4477	4.26139	0	33.6405	0	0	229.061	0	0.08107	0	0.337	0.2125	0	2.28384	0	0	3.44865	0.08256	0	0.93312
GNP37	0	0.49567	0	0.00107	0	0.53062	24.2766	0.25896	0.67392	0	41.1588	0	0	0	0.07347	0.00236	0	0.26287	0	0	32.9984	192.782	12.2241	24.8662	0	238.896	0.26529	1.55825	0	5.38996	1.11622	0	15.8015	0	0	217.133	0	0.00363	0	0.001	0.02	0	0.21424	0	0	1.04995	0.02064	0	0.297
GNP38	0	0.39188	0	0.00214	0	0.52632	24.6284	0.2184	1.47528	0	43.9437	0	0.02052	0	0.09951	0.08614	0	1.20571	0	0	29.8976	196.62	15.4749	41.7459	0	250.405	0.0999	4.08595	0	8.1357	5.39784	0	24.0061	0	0	236.268	0	0.00363	0	0.043	0.0775	0	0.46696	0	0	1.69818	0.2967	0	1.17504
GNP39	0	0.4947	0.00309	0.00107	0	0.79722	20.9602	0.14456	0.56268	0	45.7263	0	0.01026	0	0.02883	0.02006	0	0.42292	0	0	42.3084	142.31	5.67735	16.6236	0	227.678	0.06771	2.00215	0	2.42802	1.28996	0	9.67652	0	0	208.154	0	0.00847	0	0.013	0.02125	0	0.11232	0	0	0.24651	0.02322	0	0.30564
GNP40	0	0.85457	0	0.00642	0	1.2298	24.3893	0.37856	1.50768	0	40.0374	0.0055	0.04446	0	0.22134	0.06254	0	0.90307	0	0	32.4018	173.958	13.4012	32.8373	0	244.448	0.28416	3.6271	0	6.12128	2.51447	0	21.1876	0	0	213.948	0.01521	0.04477	0	0.036	0.17	0	0.4056	0	0	1.18524	0.06321	0	0.81972
GNP41	0.00576	0.7081	0	0.00107	0	0.52202	24.0776	1.2428	2.81016	0	42.7892	0	0.98382	0	0.32736	0.76818	0	0.84002	0	0	33.4058	243.476	99.1011	169.452	0	267.176	6.35364	100.116	0	10.0157	61.385	0	21.6531	0	0	226.32	0.01989	5.28165	0	0.045	35.9275	0	0.9256	0	0	2.01192	9.26865	0	0.297
GNP42	0	0.49567	0	0	0	0.45838	24.3226	0.5928	1.17936	0	41.7818	0.0022	0.2622	0	0.28458	0.31506	0	0.43553	0	0	33.5912	252.488	102.463	181.222	0	250.052	4.11921	137.959	0	12.7361	81.0592	0	14.2992	0	0	231.908	0	1.7303	0	0.099	9.30875	0	0.50752	0	0	3.49098	5.25417	0	0.32832
GNP43	0.0192	0.42195	0	0	0	0.73358	23.8885	0.84136	2.9862	0	40.8143	0.0638	1.46034	0	0.29574	0.7965	0	0.79443	0	0	32.1997	232.872	96.3679	178.287	0	259.45	6.67221	107.614	0	10.0815	66.1557	0	21.3042	0	0	222.394	0.00117	4.97915	0	0.24	30.5025	0	1.09304	0	0	1.96793	8.10636	0	0.48168
GNP44	0.0048	0.74011	0.00309	0.05029	0	0.56244	26.5453	0.76648	4.1958	0	45.4123	0.0385	0.8322	0	0.33387	0.59	0	1.19989	0	0	28.921	265.842	127.794	232.647	0	273.007	5.66877	113.253	0	14.4281	72.5829	0	24.2285	0	0	235.27	0.01755	3.86111	0	0.113	33.9825	0	1.02024	0	0	3.10171	12.3569	0	1.08216
GNP45	0.02784	0.78958	0.00515	0.02675	0	0.6407	26.5805	1.26464	2.5866	0	41.8244	0	0.3534	0	0.37944	0.37288	0	1.16109	0	0	25.7777	280.269	112.29	195.057	0	284.858	4.44666	112.247	0	19.1845	81.5495	0	21.9834	0	0	234.351	0	2.6741	0	0.108	38.935	0	1.05664	0	0	4.18984	13.5644	0	0.91152
GNP46	0.00576	0.54126	0	0	0	0.40334	25.2497	0.92144	2.8836	0	44.2926	0.033	0.82422	0	0.38967	0.87438	0	0.94478	0	0	33.2059	235.391	96.2115	164.927	0	251.879	2.39982	139.083	0	11.2302	97.1254	0	18.9953	0	0	228.409	0.05148	1.37456	0	0.154	14.5437	0	0.56888	0	0	2.93903	14.1397	0	2.0466
GNP47	0	0.80704	0	0	0	0.56588	22.835	0.5356	1.12752	0	42.9397	0.1111	1.28478	0	0.06231	0.94164	0	0.3395	0	0	38.2318	177.792	81.3572	184.188	0	232.99	1.5873	100.803	0	3.34452	65.8189	0	13.0957	0	0	212.695	0	2.06063	0	0.023	34.2413	0	0.21528	0	0	0.73621	9.6234	0	0.28188
GNP48	0.00384	0.78376	0.00206	0.00963	0	0.97696	35.5142	0.9516	2.25288	0	58.1029	0.0286	0.06156	0	0.65007	0.09086	0	1.53842	0	0	38.1125	267.802	29.989	56.3159	0	396.222	0.51615	6.46875	0	20.5249	5.02894	0	34.985	0	0	372.505	0	0.00847	0	0.121	0.12875	0	1.27712	0	0	5.45144	0.129	0	1.61136
GNP49	0.00192	0.58394	0.01545	0.00321	0	0.83076	26.3591	0.728	1.63404	0	41.7574	0.0011	0.03192	0	0.39432	0.03776	0	1.05633	0	0	29.868	203.968	23.7951	44.6573	0	321.367	0.53502	5.15775	0	16.4246	3.65925	0	27.4233	0	0	316.565	0	0.0121	0	0.18	0.08125	0	0.94536	0	0	4.51437	0.1032	0	1.01952
GNP50	0.01152	0.46366	0.00618	0.00428	0	0.83678	22.2039	0.5616	1.22796	0	36.0267	0.0011	0.01026	0	0.33201	0.03776	0	0.89337	0	0	31.0088	185.47	19.3693	36.7036	0	326.727	0.37962	4.26075	0	14.8896	2.90479	0	28.3357	0	0	346.196	0	0.00726	0	0.09	0.04	0	0.76336	0	0	4.71523	0.05418	0	1.06164
GNP51	0.00768	0.85069	0.00618	0.01926	0	1.30892	33.6777	0.77376	2.01852	0	55.3094	0.0022	0.03306	0	0.44919	0.06254	0	1.47731	0	0	43.2166	263.522	26.629	50.8463	0	412.65	0.51726	6.7597	0	18.2388	4.12454	0	34.3843	0	0	399.982	0.00117	0.03267	0	0.182	0.07625	0	1.04624	0	0	5.31532	0.1032	0	1.32516
GNP52	0.0096	1.0379	0.00206	0.01712	0	1.44566	40.1555	0.76752	2.42784	0	66.71	0	0.03192	0	0.40455	0.05074	0	1.58983	0	0	50.1007	304.021	29.0609	57.5117	0	464.165	0.66156	7.90855	0	18.5095	4.15548	0	36.3737	0	0	431.95	0	0.02178	0	0.147	0.0975	0	1.07328	0	0	4.89534	0.06837	0	1.17828
GNP53	0.00192	1.06409	0.00412	0.0214	0	1.36052	44.246	0.7696	2.78748	0	73.6359	0.0033	0.03762	0	0.45105	0.06372	0	1.96231	0	0	52.2895	336.111	28.9013	60.7577	0	496.407	0.63492	8.5008	0	18.0621	4.51724	0	39.9448	0	0	453.19	0	0.02541	0	0.168	0.09	0	1.18352	0	0	4.47536	0.07869	0	1.57032
GNP54	0.0192	2.91485	0.00206	0.02247	0	2.86466	88.4058	0.83304	6.2856	0	139.371	0	0.1197	0	0.74307	0.0826	0	3.07102	0	0	76.2229	578.171	42.4137	108.62	0	722.992	0.77922	12.1405	0	24.0997	7.00672	0	54.5801	0	0	538.36	0	0.01089	0	0.178	0.185	0	2.12784	0	0	4.29359	0.09933	0	1.77228
GNP55	0	0.18527	0	0.00214	0	0.32508	10.2165	0.07384	0.15012	0	20.6425	0	0.0057	0	0.05859	0	0	0.1261	0	0	20.5823	74.2763	3.0828	6.80269	0	156.922	0.1554	1.081	0	2.35188	0.27608	0	6.29748	0	0	177.408	0	0.05445	0	0.051	0.04625	0	0.3796	0	0	0.76609	0.00645	0	0.1512
GNP56	0	0.05529	0	0	0	0.0946	4.22282	0.03952	0.05292	0	7.97703	0	0	0	0.02697	0	0	0.05141	0	0	9.0364	31.1325	1.64115	2.95499	0	83.6307	0.04995	0.47495	0	1.57826	0.09163	0	3.01056	0	0	108.795	0	0.01089	0	0.012	0.01625	0	0.156	0	0	0.65321	0	0	0.04428
GNP57	0	0.05432	0	0	0	0.086	4.15618	0.02912	0.07128	0	7.56291	0	0.00342	0	0.03534	0	0	0.04365	0	0	8.36152	30.9365	1.96455	2.95717	0	81.6093	0.02553	0.4876	0	1.73712	0.08806	0	2.79692	0	0	104.666	0	0.00605	0	0.009	0.01125	0	0.16328	0	0	0.65736	0	0	0.05076
GNP58	0.00096	0.10379	0	0	0	0.18146	5.9437	0.0936	0.13716	0	10.2651	0.0011	0.00342	0	0.06324	0.00236	0	0.09409	0	0	11.0314	46.0994	4.0236	5.24181	0	103.605	0.10434	0.90965	0	3.4122	0.21182	0	4.59914	0	0	124.426	0	0.00726	0	0.029	0.01375	0	0.19448	0	0	1.32717	0	0	0.09396
GNP59	0	0.05141	0	0	0	0.11438	5.2626	0.09984	0.13716	0	8.78613	0	0.00228	0	0.06696	0.00118	0	0.1067	0	0	8.57432	51.2424	5.52195	5.80752	0	100.648	0.18204	0.9844	0	4.5825	0.14518	0	4.53152	0	0	115.661	0.00117	0.00121	0	0.046	0.00125	0	0.11856	0	0	1.71893	0	0	0.0702
GNP60	0	0.15908	0	0.00107	0	0.28208	9.99404	0.06448	0.1458	0	19.7969	0.0022	0.00912	0	0.05301	0.00118	0	0.13095	0	0	20.1491	71.9479	2.772	7.07519	0	155.576	0.16983	1.11895	0	2.17986	0.38318	0	6.58952	0	0	177.021	0.00351	0.03872	0	0.041	0.06	0	0.37648	0	0	0.69471	0.01419	0	0.21492
GNP61	0	0.18527	0	0.00107	0	0.32336	10.2165	0.02392	0.19548	0	20.9035	0	0.00342	0	0.01581	0.00826	0	0.16587	0	0	20.8863	73.1587	1.42485	8.38101	0	157.111	0.05994	0.64285	0	1.0481	0.9877	0	7.48132	0	0	177.241	0	0.00968	0	0.012	0.055	0	0.19136	0	0	0.31291	0.02967	0	0.37692
GNP62	0	0.17169	0	0.00107	0	0.28294	9.88722	0.01976	0.23544	0	20.3711	0.0022	0.00114	0	0.01674	0.00708	0	0.16781	0	0	20.463	72.7004	0.7938	9.43286	0	156.907	0.00555	0.3749	0	0.61382	1.38397	0	8.20456	0	0	178.001	0	0.00363	0	0.006	0.03125	0	0.10504	0	0	0.23323	0.08127	0	0.5022
GNP63	0	0.23959	0	0.00321	0	0.43946	14.8225	0	0.40932	0	29.8828	0	0	0	0	0.01534	0	0.31234	0	0	29.241	106.297	0	14.8785	0	203.615	0	0	0	0	2.68345	0	11.5581	0	0	214.515	0	0	0	0	0	0	0	0	0	0	0.18963	0	0.84132
GNP64	0.02304	3.23398	0.00412	0.01712	0	4.48748	75.7021	0.94016	1.56924	0	131.516	0.0066	0.08664	0	0.45849	0.04012	0	0.99716	0	0	117.744	457.009	22.9761	50.092	0	605.397	1.30425	6.8287	0	12.0668	2.91193	0	26.9431	0	0	473.412	0.0117	0.27709	0	0.192	0.4725	0	0.98176	0	0	2.61782	0.0387	0	0.78948
GNP65	0.02112	2.53267	0.02678	0.02996	0	3.82786	59.1744	1.27816	2.25828	0	102.126	0.0132	0.09348	0	0.74958	0.0649	0	1.41232	0	0	91.1257	341.693	28.1946	54.8771	0	508.137	1.05783	7.46695	0	16.1351	4.11026	0	31.1277	0	0	427.498	0.00936	0.22385	0	0.223	0.42	0	1.12944	0	0	4.31102	0.08772	0	0.97524
GNP66	0.02976	3.72189	0.02266	0.06099	0	4.70592	71.6866	2.44712	4.11588	0	112.566	0.0275	0.11742	0	1.17087	0.09558	0	1.91963	0	0	89.4704	375.175	41.5201	69.9137	0	507.989	1.25208	8.6572	0	20.9112	5.75008	0	35.1457	0	0	385.625	0.00702	0.15125	0	0.186	0.445	0	1.34264	0	0	4.73847	0.11223	0	1.19664
GNP67	0	3.58221	0	0.09095	0	3.01516	98.93	4.08616	5.10732	0	134.016	0	0.14022	0	1.18761	0.02006	0	1.76152	0	0	68.5811	570.884	106.644	124.503	0	737.066	2.27883	19.5799	0	40.8872	11.4978	0	51.6303	0	0	473.93	0	0.33759	0	0.211	0.93	0	2.73936	0	0	4.85633	0.25284	0	2.10492
GNP68	0.03072	3.22816	0.00206	0.00963	0	4.33268	79.7112	0.7696	1.37484	0	136.645	0.0055	0.08436	0	0.31527	0.04248	0	0.88367	0	0	124.564	473.237	19.3725	43.213	0	617.786	1.3986	6.29855	0	9.35206	2.74533	0	23.5033	0	0	477.342	0.00936	0.30855	0	0.166	0.395	0	0.91832	0	0	1.59443	0.07611	0	0.91152
GNP69	0.03552	3.26793	0.00309	0.01605	0	4.1581	76.6302	0.87984	1.89216	0	128.272	0.0022	0.06156	0	0.37758	0.08614	0	1.18631	0	0	118.949	420.665	20.6178	43.2272	0	579.288	1.14441	5.74655	0	10.1605	3.96746	0	23.9581	0	0	460.086	0.0117	0.2057	0	0.149	0.375	0	0.87672	0	0	2.05508	0.23994	0	1.23336
GNP70	0.0288	3.68406	0.0103	0.01926	0	4.32408	84.2447	1.06392	2.18268	0	142.304	0.0011	0.03306	0	0.43338	0.14632	0	1.35024	0	0	123.322	457.516	26.4747	47.6777	0	609.984	0.71373	6.06855	0	12.3648	7.8421	0	24.2638	0	0	478.061	0.01404	0.06655	0	0.05	0.47625	0	0.98384	0	0	2.6892	0.94686	0	1.99584
GNP71	0.04896	2.46768	0	0	0	2.494	67.8346	0.82784	1.40616	0	130.703	0.0022	0.0285	0	0.27993	0.14514	0	0.83614	0	0	106.878	468.207	27.4481	47.6962	0	651.353	0.40404	6.17435	0	15.1039	12.0499	0	24.4471	0	0	551.982	0	0	0	0.117	0.72375	0	1.03064	0	0	3.92009	2.02272	0	3.1104
GNP72	0	4.25151	0	0.00749	0	4.62508	105.022	0.56472	4.77144	0	177.072	0	0.00114	0	0.6138	0.10266	0	2.08065	0	0	113.095	788.617	53.4964	108.103	0	836.453	0.01665	8.24895	0	27.6341	6.06781	0	39.5146	0	0	599.134	0	0.00484	0	0.147	0.1175	0	1.12008	0	0	4.32596	0.13932	0	1.0854
GNP73	0	1.01365	0	0.00107	0	2.55678	73.9589	0.6916	3.942	0	141.802	0	0	0	0.62496	0.00236	0	1.61505	0	0	75.8361	579.126	50.9313	97.6411	0	685.361	1.31979	5.8535	0	39.8212	3.64616	0	50.667	0	0	661.437	0	0.0121	0	0.152	0.03875	0	1.86472	0	0	8.16388	0	0	1.99152
GNP74	0.03168	4.14578	0.01957	0.04815	0	6.60824	113.411	3.00144	6.00804	0	169.51	0.0066	0.1197	0	1.16808	0.10738	0	2.77711	0	0	112.28	739.654	81.9084	110.941	0	822.263	0.96348	16.537	0	36.6149	5.99641	0	52.673	0	0	586.152	0	0.06413	0	0.152	0.28125	0	2.34208	0	0	5.05802	0.06192	0	0.96012
GNP75	0.01536	3.84411	0.0206	0.06634	0	5.7792	111.194	3.23544	6.21324	0	166.59	0.0055	0.15732	0	1.20063	0.05074	0	2.82852	0	0	101.624	748.535	85.3702	115.556	0	828.319	0.97014	17.9412	0	38.54	5.01228	0	55.8081	0	0	592.242	0	0.03993	0	0.153	0.205	0	2.6884	0	0	4.79408	0.03096	0	0.96768
GNP76	0	3.34553	0.00721	0.09309	0	5.06368	106.303	3.04824	6.53616	0	163.179	0	0.24396	0	1.18389	0.00118	0	2.89448	0	0	89.18	758.417	88.1443	121.665	0	836.165	0.84027	19.6604	0	39.6821	3.99364	0	59.2155	0	0	602.167	0	0.01936	0	0.087	0.2175	0	3.33008	0	0	4.41892	0.01548	0	0.97956
GNP77	0.04416	2.43276	0.00103	0.00749	0	2.33748	98.3685	2.41696	4.9788	0	142.674	0	0.12198	0	0.74493	0.05664	0	1.98171	0	0	72.0992	653.749	73.7194	92.7688	0	786.626	0.27861	11.523	0	27.7253	3.79253	0	44.7605	0	0	586.65	0	0	0	0.011	0.21125	0	2.37224	0	0	3.47438	0.02451	0	0.50436
GNP78	0.06912	2.98469	0	0	0	4.902	77.3729	0.03224	1.242	0	133.776	0	0.01254	0	0	0.17228	0	1.28331	0	0	112.51	507.114	10.627	43.6098	0	581.061	0	1.7158	0	2.63764	2.28242	0	19.8362	0	0	412.557	0	0	0	0	0	0	0.09152	0	0	0.07719	0.00516	0	0.5724
GNP79	0	3.79755	0.00103	0.01605	0	4.2183	99.3318	2.21312	5.65596	0	155.763	0	0.08436	0	0.9765	0.08496	0	2.71503	0	0	83.0803	724.642	77.0941	106.588	0	794.131	0.03996	13.2779	0	30.2116	3.72708	0	53.6462	0	0	590.165	0	0.00968	0	0.009	0.13	0	3.4112	0	0	3.6437	0.00387	0	0.7452
GNP80	0	4.29516	0	0.08774	0	3.33766	105.052	1.3156	5.184	0	157.553	0	0.20178	0	0.88443	0.19588	0	1.22899	0	0	80.9471	616.989	40.4639	100.453	0	700.09	1.28538	10.2615	0	19.129	7.03052	0	40.8376	0	0	481.647	0	0	0	0.188	0.24875	0	1.44872	0	0	2.3157	0.00774	0	0.83916
GNP81	0.00384	2.03409	0	0	0	2.55162	86.4066	0.03952	2.46996	0	133.919	0	0	0	0.02883	0	0	0.45881	0	0	81.0732	630.17	35.9709	76.4448	0	642.752	0.06882	4.7748	0	19.2982	1.61245	0	29.352	0	0	475.472	0	0	0	0.011	0	0	1.15752	0	0	2.03765	0	0	0.38556
GNP82	0	0.08536	0	0	0	0.1505	4.8118	0.05616	0.07452	0	8.78178	0	0.00456	0	0.03534	0	0	0.05238	0	0	9.63148	36.9508	2.5032	3.53596	0	91.1969	0.06438	0.58765	0	2.19678	0.13447	0	3.3712	0	0	114.335	0	0.01331	0	0.03	0.01875	0	0.17056	0	0	0.8798	0.00129	0	0.06156
GNP83	0	0.17072	0	0.00107	0	0.32594	10.2645	0.06136	0.15444	0	20.8939	0.0011	0.00684	0	0.03999	0.00354	0	0.14744	0	0	21.0991	73.1517	2.709	7.22452	0	156.551	0.12543	1.035	0	1.974	0.52955	0	6.79826	0	0	177.104	0	0.04598	0	0.045	0.06	0	0.34736	0	0	0.68226	0.01548	0	0.24084
GNP84	0.04608	3.39985	0.02884	0.03959	0	2.74856	70.6235	2.8288	4.62888	0	97.6681	0.0561	0.2052	0	1.02207	0.11682	0	1.97395	0	0	65.4474	372.709	57.1746	76.5342	0	467.912	1.16883	11.1976	0	22.2235	6.19871	0	32.5968	0	0	323.457	0.01404	0.19602	0	0.204	0.4325	0	1.0348	0	0	3.98815	0.16899	0	0.83916
GNP85	0.02784	3.25435	0	0.00107	0	3.05386	68.4099	0.71136	1.24416	0	106.11	0	0.02622	0	0.15624	0.059	0	0.79346	0	0	92.3035	335.973	14.1981	28.5711	0	402.667	0.60384	2.90605	0	5.62308	2.95239	0	12.3588	0	0	289.686	0.00117	0.0363	0	0.018	0.18	0	0.25168	0	0	0.95865	0.21414	0	0.68904
GNP86	0.03648	4.16615	0.02369	0.0428	0	6.11632	112.624	2.55424	5.60196	0	172.819	0.0055	0.07296	0	0.96348	0.09912	0	2.52006	0	0	116.521	746.885	74.6917	108.308	0	825.014	0.86691	13.6792	0	33.8983	6.03806	0	48.8883	0	0	585.362	0	0.03993	0	0.161	0.28375	0	2.01864	0	0	5.2954	0.06708	0	0.80028
GNP87	0	2.93522	0	0.01177	0	3.63694	102.866	0.48568	3.97872	0	156.124	0	0.01254	0	0.37014	0.00944	0	1.11938	0	0	100.978	754.867	41.1159	102.849	0	798.229	0.6549	6.49175	0	25.0388	2.93573	0	37.4007	0	0	613.275	0	0.00121	0	0.022	0.09375	0	0.98176	0	0	2.52071	0.02838	0	0.58644
GNP88	0	1.93806	0.00412	0.00642	0	2.10786	66.0608	0.58656	3.4182	0	104.949	0	0.01368	0	0.38316	0.18998	0	1.85949	0	0	57.2744	413.524	30.6926	75.4093	0	517.474	0.80697	8.91825	0	16.4162	5.10629	0	39.7341	0	0	400.143	0	0.01089	0	0.213	0.0625	0	1.09824	0	0	3.11333	0.00387	0	1.41048
GNP89	0.00864	0.70228	0.00618	0.01177	0	0.92794	23.424	0.3328	0.94068	0	37.7258	0.0022	0.02394	0	0.11439	0.01652	0	0.60722	0	0	33.9408	171.799	12.8741	24.755	0	237.415	0.23532	2.63925	0	4.66052	1.14121	0	13.9895	0	0	208.309	0	0.00968	0	0.025	0.05875	0	0.22256	0	0	0.73787	0.00387	0	0.19116
GNP90	0.02496	0.90307	0	0.00535	0	1.1567	26.3934	0.53144	1.28736	0	39.4397	0.0011	0.01368	0	0.25575	0.05074	0	0.74884	0	0	32.4687	169.888	16.4619	33.608	0	251.073	0.40404	3.2591	0	7.90634	1.91471	0	20.2654	0	0	213.403	0.00468	0.00242	0	0.058	0.0575	0	0.36192	0	0	1.53965	0.03999	0	0.51624
GNP91	0.00192	0.72071	0	0.00214	0	0.82388	22.1372	0.29224	0.41472	0	42.5761	0.0011	0	0	0.14322	0	0	0.29779	0	0	39.1871	156.073	8.77905	15.4039	0	224.215	0.17205	1.50075	0	5.35612	0.35224	0	10.485	0	0	209.891	0	0.00484	0	0.015	0	0	0.09984	0	0	1.5355	0.00645	0	0.0918
GNP92	0.0192	0.97485	0	0.00214	0	1.09908	22.4322	0.30056	0.93636	0	40.897	0.0044	0.0456	0	0.1023	0.00472	0	0.52671	0	0	39.2608	157.5	10.5473	20.5269	0	228.875	0.23199	2.5185	0	4.56652	0.76993	0	12.936	0	0	207.348	0.00468	0.02783	0	0.008	0.03125	0	0.23296	0	0	0.68807	0.02322	0	0.1998
GNP93	0.00672	0.54223	0	0.00535	0	0.73788	23.5582	0.3328	0.88668	0	41.3807	0	0	0	0.12462	0.00472	0	0.58976	0	0	34.6613	185.821	12.2944	24.8019	0	235.63	0.07326	2.10795	0	4.78836	0.61047	0	15.4909	0	0	213.763	0	0.00121	0	0.009	0.04625	0	0.15704	0	0	0.92379	0.00129	0	0.16632
GNP94	0.00576	0.67609	0	0.00107	0	0.6923	22.9653	0.16744	0.8478	0	40.6864	0	0.00684	0	0.10416	0.00944	0	0.68094	0	0	34.9076	176.312	9.68415	26.5055	0	228.968	0.06882	1.5433	0	6.5612	0.80325	0	17.4146	0	0	211.029	0	0	0	0.005	0.02	0	0.17264	0	0	1.10307	0.01419	0	0.20844
GNP95	0.00288	0.68579	0	0.0107	0	0.6063	23.9757	0.3432	0.67608	0	40.4498	0	0.01026	0	0.24087	0.00236	0	0.63341	0	0	31.6814	184.083	16.569	23.0077	0	232.495	0.14208	2.2862	0	10.6333	0.7378	0	15.044	0	0	220.395	0	0.00242	0	0.05	0.00625	0	0.30784	0	0	2.00113	0.00258	0	0.17928
GNP96	0.00096	0.45299	0.00412	0.00642	0	0.41452	24.2785	0.286	0.87264	0	41.1223	0	0.01482	0	0.16089	0.0059	0	0.66639	0	0	31.4762	197.924	16.8882	26.124	0	246.251	0.28527	3.25565	0	8.75892	1.28758	0	14.1698	0	0	226.303	0	0.00242	0	0.027	0.07375	0	0.34216	0	0	2.09326	0.00903	0	0.23976
GNP97	0.01248	0.43359	0.00103	0.00428	0	0.79206	23.1456	0.46904	0.93096	0	40.3141	0.0055	0.00456	0	0.28272	0.00472	0	0.6693	0	0	31.106	195.065	19.6487	27.4952	0	245.755	0.44844	4.4114	0	8.93282	1.27925	0	14.6059	0	0	229.831	0.00819	0.02299	0	0.12	0.03375	0	0.3432	0	0	1.87248	0.0129	0	0.19332
GNP98	0.00768	0.79346	0.00206	0.00428	0	0.70004	24.9969	0.6708	2.1438	0	38.2609	0.0077	0.03762	0	0.41478	0.02596	0	1.17952	0	0	25.5064	205.251	27.7998	50.0179	0	270.409	0.78477	8.3674	0	17.6043	3.63545	0	30.8465	0	0	231.634	0.00117	0.08107	0	0.25	0.195	0	1.58496	0	0	2.85769	0.0516	0	0.7452
GNP99	0.00384	0.49276	0.00309	0.00428	0	0.76454	23.0378	0.28808	0.62748	0	42.3403	0	0	0	0.20367	0.00472	0	0.45202	0	0	36.9763	183.578	11.9091	23.4012	0	230.427	0.15984	1.52375	0	5.23016	0.81991	0	15.2831	0	0	209.601	0	0.00121	0	0.047	0.02625	0	0.14872	0	0	1.22176	0.02322	0	0.3078
GNP100	0.00288	0.81189	0.01133	0.01177	0	1.12832	23.3681	0.31928	1.45476	0	38.7576	0.0011	0.02052	0	0.2232	0.04248	0	0.95448	0	0	32.9354	164.189	12.895	30.8753	0	236.072	0.1887	3.40745	0	6.20964	2.4038	0	20.0243	0	0	206.426	0	0.01452	0	0.028	0.12125	0	0.2756	0	0	1.13046	0.08127	0	0.6156
GNP101	0.01152	0.81771	0.00721	0.00749	0	1.08188	23.2652	0.41288	1.08324	0	37.9407	0.0044	0.02394	0	0.14415	0.0059	0	0.65281	0	0	37.9764	163.407	12.3407	23.2115	0	230.217	0.2775	2.61165	0	5.16154	1.05434	0	13.2486	0	0	206.935	0	0.00484	0	0.016	0.04375	0	0.27664	0	0	0.80012	0.0129	0	0.21168
GNP102	0.01248	0.59364	0.00103	0.00749	0	0.61232	21.7501	0.29744	0.33588	0	42.3751	0.0033	0.00228	0	0.14229	0.00118	0	0.291	0	0	37.3092	155.093	6.6003	14.303	0	219.467	0.13431	1.10515	0	4.05516	0.5355	0	10.0009	0	0	208.3	0	0	0	0.011	0.00375	0	0.08632	0	0	0.87648	0.00387	0	0.13068
GNP103	0.01728	0.6402	0.00103	0.00107	0	0.75852	22.2548	0.47632	0.34236	0	42.2141	0	0.00228	0	0.1581	0.00118	0	0.22504	0	0	38.738	159.652	8.9481	14.2964	0	226.137	0.15318	1.19945	0	4.66428	0.45458	0	8.93564	0	0	210.151	0	0	0	0.034	0.015	0	0.11336	0	0	1.02339	0.00129	0	0.12744
GNP104	0.00576	0.94963	0	0.01391	0	0.9374	22.2558	0.29016	1.01304	0	40.6307	0	0.0057	0	0.11718	0.03422	0	0.53253	0	0	38.7494	159.447	10.7677	23.8307	0	228.179	0.13431	2.3736	0	4.3569	1.23879	0	14.8196	0	0	206.747	0	0.03025	0	0.007	0.045	0	0.22152	0	0	0.5893	0.01419	0	0.35856
GNP105	0.01152	0.70034	0.00103	0.01498	0	0.82302	24.106	0.52312	1.79712	0	40.4254	0	0.03534	0	0.19065	0.03894	0	1.05827	0	0	31.1965	197.483	23.75	35.8239	0	245.453	0.25308	4.55055	0	9.66414	2.51685	0	21.4091	0	0	222.252	0.00117	0.04356	0	0.049	0.10875	0	0.78728	0	0	1.42428	0.05934	0	0.69444
GNP106	0.00096	0.61983	0.00103	0.00856	0	0.74304	22.8585	0.35672	0.91584	0	38.1878	0	0.01254	0	0.12183	0.02714	0	0.51507	0	0	32.7302	178.329	13.2752	26.5132	0	231.485	0.14985	2.3437	0	6.47942	1.21975	0	16.8325	0	0	208.484	0	0.00847	0	0.021	0.0275	0	0.55328	0	0	1.22923	0.0129	0	0.3564
GNP107	0.00192	0.5141	0	0.00963	0	0.8299	23.4543	0.60112	1.47096	0	40.8404	0	0.04902	0	0.41664	0.01416	0	1.04275	0	0	28.0379	197.396	21.5408	36.309	0	251.728	0.6771	5.58095	0	11.358	1.8207	0	20.5555	0	0	235.556	0.01404	0.05566	0	0.156	0.15375	0	0.69888	0	0	2.37214	0.03225	0	0.4158
GNP108	0.01248	0.99619	0.00412	0.01605	0	1.18422	23.5964	0.6188	1.3068	0	42.3681	0.0011	0.01026	0	0.28644	0.02478	0	0.79734	0	0	34.3034	158.107	18.6942	28.2681	0	235.011	0.42957	3.75015	0	8.28046	1.5589	0	17.7782	0	0	214.768	0	0.01452	0	0.012	0.0475	0	0.47528	0	0	1.20931	0.01548	0	0.52272
GNP109	0.00384	0.5917	0	0.00214	0	0.79206	20.5849	0.1716	0.4158	0	41.8653	0	0.00456	0	0.08091	0.00354	0	0.26287	0	0	40.4882	146.686	7.91805	14.5123	0	221.316	0.12876	1.5801	0	3.86904	0.6902	0	8.7857	0	0	206.727	0	0.00121	0	0.015	0.0175	0	0.08632	0	0	0.90387	0.01161	0	0.16524
GNP110	0.00096	0.60237	0.00103	0.00856	0	0.68026	22.4342	0.62088	0.51948	0	42.2777	0.0088	0.00228	0	0.19995	0.02242	0	0.41225	0	0	35.3636	170.188	16.0062	18.8374	0	236.386	0.51837	2.11255	0	7.9853	0.54621	0	11.8923	0	0	215.772	0	0.00121	0	0.068	0.01125	0	0.18824	0	0	2.22689	0.00129	0	0.2052
GNP111	0.01152	0.77697	0.00412	0.00963	0	1.0492	22.8565	0.73112	1.04544	0	41.5216	0.0011	0.02508	0	0.31713	0.01416	0	0.66542	0	0	34.3611	161.063	20.4246	24.4225	0	234.043	0.34521	3.1832	0	8.79558	1.18048	0	14.0277	0	0	212.279	0	0.00605	0	0.067	0.04625	0	0.4264	0	0	1.94718	0.01161	0	0.20304
GNP112	0.00672	0.98649	0.00515	0.01498	0	1.17132	23.7915	0.55952	1.13724	0	40.9022	0.0044	0.01938	0	0.23343	0.01652	0	0.7372	0	0	35.8515	159.675	16.5039	30.1919	0	236.05	0.43623	4.5655	0	8.41018	1.79333	0	18.621	0	0	211.459	0.00117	0.04961	0	0.022	0.0675	0	0.52104	0	0	1.11386	0.03096	0	0.46872
GNP113	0	0.53835	0.00103	0.00963	0	0.55298	24.4588	0.34944	0.7452	0	39.9078	0	0.0057	0	0.17856	0.00118	0	0.63244	0	0	30.5512	185.47	15.9789	22.5096	0	234.43	0.11433	2.04585	0	10.0702	0.79849	0	15.2439	0	0	220.67	0	0.00484	0	0.027	0.0125	0	0.27768	0	0	1.87746	0.00903	0	0.162
GNP114	0.00672	0.77503	0.00206	0.01177	0	0.7654	25.7407	0.40248	1.09188	0	43.6757	0.0011	0.01824	0	0.17019	0.01298	0	0.72168	0	0	33.2166	202.078	21.5397	30.0927	0	248.718	0.43956	4.35505	0	10.4321	1.82427	0	16.6884	0	0	222.153	0	0.01573	0	0.076	0.02625	0	0.45136	0	0	1.95382	0.02193	0	0.37584
GNP115	0.00672	0.59461	0.00206	0.00749	0	0.7955	24.5862	0.35464	1.4202	0	40.0931	0.0055	0.0114	0	0.23901	0.03658	0	0.86718	0	0	28.804	199.434	21.5019	33.7617	0	246.799	0.84693	4.46315	0	11.7961	1.64815	0	19.9626	0	0	229.76	0.00351	0.05929	0	0.193	0.03	0	0.45448	0	0	2.54063	0.01806	0	0.4698
GNP116	0.00288	0.54126	0.00412	0.0214	0	1.02512	22.1411	0.43368	1.8252	0	38.5915	0	0.03876	0	0.30039	0.03304	0	1.09416	0	0	25.5231	186.479	22.0647	40.3071	0	253.679	0.71484	6.9023	0	13.9891	2.42403	0	27.8349	0	0	228.473	0	0.05808	0	0.184	0.1275	0	1.25424	0	0	3.26024	0.0387	0	0.75924
GNP117	0	0.57715	0.00412	0.00749	0	0.6364	23.1662	0.27976	0.85212	0	38.4497	0	0	0	0.09021	0.00826	0	0.45784	0	0	33.0478	178.315	11.8303	24.912	0	230.371	0.19092	1.73075	0	5.20102	1.10551	0	15.8985	0	0	210	0	0.00121	0	0.005	0.01	0	0.22048	0	0	1.09975	0.01161	0	0.26784
GNP118	0.00288	0.80801	0.00103	0.00428	0	1.08704	22.8801	0.37856	1.5228	0	38.6219	0	0.03648	0	0.20274	0.04248	0	0.91568	0	0	31.8425	162.281	13.4085	30.4775	0	232.437	0.26307	3.62595	0	6.68152	2.43712	0	20.6006	0	0	207.718	0	0.02783	0	0.039	0.1175	0	0.37232	0	0	1.22508	0.05676	0	0.64368
GNP119	0	0.12125	0	0	0	0.47128	0.44492	0	0	0	4.09683	0	0	0	0	0	0	0	0	0	6.49952	13.2512	0	0	0	27.383	0	0	0	0	0	0	0	0	0	30.4435	0	0	0	0	0	0	0	0	0	0	0	0	0
GNP120	0	0.04753	0	0	0	0.1677	0.5586	0	0	0	3.03891	0	0	0	0	0	0	0	0	0	6.54208	16.6379	0	0	0	28.5349	0	0	0	0	0	0	0	0	0	29.4317	0	0	0	0	0	0	0	0	0	0	0	0	0
GNP121	0	0.02425	0	0	0	0.34228	0.50568	0	0	0	4.38045	0	0	0	0	0	0	0	0	0	6.63556	12.9868	0	0	0	27.1999	0	0	0	0	0	0	0	0	0	29.605	0	0	0	0	0	0	0	0	0	0	0	0	0
GNP122	0	0.09894	0	0	0	0.2064	0.39004	0	0	0	3.83322	0	0	0	0	0	0	0	0	0	6.88408	14.5966	0	0	0	27.72	0	0	0	0	0	0	0	0	0	28.0511	0	0	0	0	0	0	0	0	0	0	0	0	0
GNP123	0	0.79055	0	0.00856	0	1.22292	11.2641	0	0.648	0	18.6345	0	0	0	0	0	0	0.32883	0	0	10.4553	43.7907	0	13.1639	0	67.1765	0	0	0	0	1.17691	0	4.5815	0	0	50.8554	0	0	0	0	0	0	0	0	0	0	0.03612	0	0.07452
GNP124	0	0.05917	0	0	0	0.34916	1.18972	0	0	0	5.17563	0	0	0	0	0	0	0	0	0	6.3688	21.0197	0	0	0	30.2298	0	0	0	0	0	0	0	0	0	27.7	0	0	0	0	0	0	0	0	0	0	0	0	0
GNP125	0	0.05432	0	0	0	0.1548	0.84672	0	0	0	4.28649	0	0	0	0	0	0	0	0	0	7.90248	16.4894	0	0.10573	0	27.779	0	0	0	0	0	0	0	0	0	28.8904	0	0	0	0	0	0	0	0	0	0	0	0	0
GNP126	0	0.06208	0	0	0	0.56072	0.4851	0	0	0	3.42519	0	0	0	0	0	0	0	0	0	7.3074	16.4429	0	0	0	28.6062	0	0	0	0	0	0	0	0	0	30.7045	0	0	0	0	0	0	0	0	0	0	0	0	0
GNP127	0	0.0582	0	0	0	0.30874	0.96138	0	0	0	4.38306	0	0	0	0	0	0	0	0	0	7.31804	17.7101	0	0	0	28.9678	0	0	0	0	0	0	0	0	0	28.6371	0	0	0	0	0	0	0	0	0	0	0	0	0
GNP128	0	0	0	0	0	0.35948	0.50764	0	0	0	3.99417	0	0	0	0	0	0	0	0	0	7.11816	16.2162	0	0.00436	0	28.5296	0	0	0	0	0	0	0	0	0	30.7792	0	0	0	0	0	0	0	0	0	0	0	0	0
GNP129	0	0.08536	0	0	0	0.3225	0.56448	0	0	0	3.59397	0	0	0	0	0	0	0	0	0	7.18048	13.6749	0	0	0	27.419	0	0	0	0	0	0	0	0	0	29.1499	0	0	0	0	0	0	0	0	0	0	0	0	0
GNP130	0	0.17266	0	0	0	0.34486	0.45178	0	0	0	4.39089	0	0	0	0	0	0	0	0	0	6.251	14.3065	0.07455	20.3056	0	27.8309	0	0.4715	0	0	30.2557	0	0	0	0	30.7361	0	0	0	0	0	0	0	0	0	0	12.2718	0	0
GNP131	0	0.12222	0	0	0	0.16598	1.09662	0	0.16632	0	4.40916	0	0	0	0	0.86258	0	0	0	0	6.04352	23.5887	1.08465	22.6382	0	33.5245	0	1.7066	0	0	32.3204	0	0.00588	0	0	29.8298	0	0	0	0	0	0	0	0	0	0	12.771	0	0
GNP132	0	0.04753	0	0	0	0	0.97314	0	0.29376	0	3.93414	0	0	0	0	0.61478	0	0	0	0	4.96052	23.0809	0.4956	26.7922	0	31.3086	0	1.7158	0	0	34.6159	0	0	0	0	29.6997	0	0	0	0	0.01625	0	0	0	0	0	11.9867	0	0
GNP133	0	0.1067	0	0	0	0.39302	1.2005	0	0.1512	0	3.98982	0	0	0	0	0.2478	0	0	0	0	5.08972	19.9564	0.70665	23.0143	0	30.8801	0	0.9315	0	0	32.8499	0	0	0	0	30.1332	0	0	0	0	0	0	0	0	0	0	13.1103	0	0
GNP134	0	0.0679	0	0	0	0.31562	0.84966	0	0.30024	0	3.19029	0	0	0	0	0.08024	0	0	0	0	6.9996	20.39	0.6006	24.7833	0	30.111	0	1.3156	0	0	32.5667	0	0	0	0	30.2325	0	0	0	0	0	0	0	0	0	0	11.8744	0	0
GNP135	0	0	0	0	0	0.13502	0.48216	0	0	0	3.86628	0	0	0	0	0	0	0	0	0	7.03684	15.8945	0	0	0	29.4413	0	0	0	0	0	0	0	0	0	29.0205	0	0	0	0	0	0	0	0	0	0	0	0	0
GNP136	0	0.05335	0	0	0	0.15394	0.48804	0	0	0	3.3843	0	0	0	0	0	0	0	0	0	6.54968	15.7786	0	0	0	28.8922	0	0	0	0	0	0	0	0	0	28.5177	0	0	0	0	0	0	0	0	0	0	0	0	0
GNP137	0	0	0	0	0	0.2107	0.35966	0	0	0	3.8628	0	0	0	0	0	0	0	0	0	6.49724	17.5824	0	0	0	28.4944	0	0	0	0	0	0	0	0	0	29.4564	0	0	0	0	0	0	0	0	0	0	0	0	0
GNP138	0	0	0	0	0	0.14964	0.46452	0	0	0	3.7671	0	0	0	0	0	0	0	0	0	6.973	15.7034	0	0	0	29.3894	0	0	0	0	0	0	0	0	0	28.9736	0	0	0	0	0	0	0	0	0	0	0	0	0
GNP139	0	0.05723	0	0	0	0.16426	0.44884	0	0	0	3.33558	0	0	0	0	0	0	0	0	0	6.4638	15.8083	0	0	0	28.7769	0	0	0	0	0	0	0	0	0	28.6217	0	0	0	0	0	0	0	0	0	0	0	0	0
GNP140	0	0	0	0	0	0.21242	0.68208	0	0	0	3.87498	0	0	0	0	0	0	0	0	0	6.3042	17.5586	0	0	0	29.3216	0	0	0	0	0	0	0	0	0	28.8996	0	0	0	0	0	0	0	0	0	0	0	0	0
GNP141	0	0.13095	0	0	0	0.41194	0.4802	0	0	0	3.95154	0	0	0	0	0	0	0	0	0	6.31408	14.2887	0.07665	20.48	0	27.2923	0	0.4485	0	0	31.6849	0	0	0	0	29.9399	0	0	0	0	0	0	0	0	0	0	11.9712	0	0
GNP142	0	0.05238	0	0	0	0.15566	0.46452	0	0	0	3.26076	0	0	0	0	0	0	0	0	0	6.5436	15.6153	0	0	0	28.6114	0	0	0	0	0	0	0	0	0	28.5508	0	0	0	0	0	0	0	0	0	0	0	0	0
GNP143	0	0	0	0	0	0.47386	0.89866	0	0	0	4.50747	0	0	0	0	0	0	0	0	0	8.23916	17.1775	0	0.05232	0	27.8916	0	0	0	0	0	0	0.00098	0	0	27.4497	0	0	0	0	0	0	0	0	0	0	0	0	0
GNP144	0	0	0	0	0	0.4773	0.9996	0	0	0	4.25169	0	0	0	0	0	0	0	0	0	8.35392	16.7449	0	0.03488	0	28.0245	0	0	0	0	0	0	0.00098	0	0	27.6669	0	0	0	0	0	0	0	0	0	0	0	0	0
GNP145	0	0.05432	0	0	0	0.24854	0.71344	0	0	0	3.45564	0	0	0	0	0	0	0	0	0	6.56868	16.7785	0	0	0	29.7255	0	0	0	0	0	0	0	0	0	29.384	0	0	0	0	0	0	0	0	0	0	0	0	0
GNP146	0	0.07372	0	0	0	0.33282	1.04762	0	0	0	4.99293	0	0	0	0	0	0	0	0	0	6.37944	21.281	0	0	0	30.7402	0	0	0	0	0	0	0	0	0	26.6466	0	0	0	0	0	0	0	0	0	0	0	0	0
GNP147	0	0	0	0	0	0.19436	0.8183	0	0	0	4.40916	0	0	0	0	0	0	0	0	0	7.78848	16.9498	0	0.05123	0	29.1597	0	0	0	0	0	0	0.00392	0	0	29.8283	0	0	0	0	0	0	0	0	0	0	0	0	0
GNP148	0	0.05044	0	0	0	0.29154	0.5047	0	0	0	3.37821	0	0	0	0	0	0	0	0	0	6.6576	15.936	0	0.01417	0	28.8059	0	0	0	0	0	0	0.00588	0	0	30.6352	0	0	0	0	0	0	0	0	0	0	0	0	0
GNP149	0	0.16005	0	0	0	0.3698	0.95452	0	0	0	3.73752	0	0	0	0	0	0	0	0	0	6.02148	17.2151	0	0	0	31.8859	0	0	0	0	0	0	0	0	0	28.8442	0	0	0	0	0	0	0	0	0	0	0	0	0
GNP150	0	0	0	0	0	0.1333	0.42826	0	0	0	3.77928	0	0	0	0	0	0	0	0	0	7.07408	16.0321	0	0	0	29.4686	0	0	0	0	0	0	0	0	0	28.9882	0	0	0	0	0	0	0	0	0	0	0	0	0
GNP151	0	0.04656	0	0	0	0.14964	0.47432	0	0	0	3.32166	0	0	0	0	0	0	0	0	0	6.4334	15.6361	0	0	0	28.7531	0	0	0	0	0	0	0	0	0	28.5093	0	0	0	0	0	0	0	0	0	0	0	0	0
GNP152	0	0.06111	0	0	0	0.28724	0.46746	0	0	0	4.72149	0	0	0	0	0	0	0	0	0	6.93728	16.6775	0	0	0	30.0687	0	0	0	0	0	0	0	0	0	29.4979	0	0	0	0	0	0	0	0	0	0	0	0	0
GNP153	0	0.11252	0	0	0	0.3053	1.01136	0	0	0	3.93327	0	0	0	0	0	0	0	0	0	8.02256	16.5201	0	0.04469	0	28.7214	0	0	0	0	0	0	0.00098	0	0	28.6124	0	0	0	0	0	0	0	0	0	0	0	0	0
GNP154	0	0.12998	0	0	0	0.47472	0.42924	0	0	0	4.10205	0	0	0	0	0	0	0	0	0	6.69408	13.3779	0	0	0	27.3865	0	0	0	0	0	0	0	0	0	30.4289	0	0	0	0	0	0	0	0	0	0	0	0	0
GNP155	0	0.05626	0	0	0	0.20296	0.76734	0	0	0	3.82452	0	0	0	0	0	0	0	0	0	6.35132	17.1181	0	0.26051	0	31.0499	0	0	0	0	0	0	0.00098	0	0	30.7946	0	0	0	0	0	0	0	0	0	0	0	0	0
GNP156	0	0.07275	0	0	0	0.40936	0.50078	0	0	0	4.16034	0	0	0	0	0	0	0	0	0	6.57856	12.8155	0	0	0	27.0459	0	0	0	0	0	0	0	0	0	29.7559	0	0	0	0	0	0	0	0	0	0	0	0	0
GNP157	0	0.06111	0	0	0	0.1634	0.47726	0	0	0	3.33819	0	0	0	0	0	0	0	0	0	6.61504	15.6846	0	0	0	28.7637	0	0	0	0	0	0	0	0	0	28.6748	0	0	0	0	0	0	0	0	0	0	0	0	0
GNP158	0	0.14162	0	0	0	0.46182	0.44394	0	0	0	4.39785	0	0	0	0	0	0	0	0	0	6.38172	13.9521	0	0	0	27.1682	0	0	0	0	0	0	0	0	0	30.0577	0	0	0	0	0	0	0	0	0	0	0	0	0
GNP159	0	0	0	0	0	0.1462	0.4655	0	0	0	3.82713	0	0	0	0	0	0	0	0	0	7.11968	15.5994	0	0	0	29.2635	0	0	0	0	0	0	0	0	0	28.9096	0	0	0	0	0	0	0	0	0	0	0	0	0
GNP160	0	0.06305	0	0	0	0.1849	0.43904	0	0	0	3.17289	0	0	0	0	0	0	0	0	0	6.53144	15.9994	0	0	0	28.8156	0	0	0	0	0	0	0	0	0	29.1961	0	0	0	0	0	0	0	0	0	0	0	0	0
GNP161	0	0.01261	0	0	0	0.0645	0.55174	0	0	0	1.51293	0	0	0	0	0	0	0	0	0	3.99532	10.5257	0	0	0	19.9021	0	0	0	0	0	0	0	0	0	29.7035	0	0	0	0	0	0	0	0	0	0	0	0	0
GNP162	0.00096	0.00776	0	0	0	0.07396	0.67718	0	0	0	1.89834	0	0	0	0	0	0	0	0	0	4.53872	9.73071	0	0	0	19.58	0	0	0	0	0	0	0	0	0	29.3308	0	0	0	0	0	0	0	0	0	0	0	0	0
GNP163	0	0.00679	0	0	0	0.07912	0.66052	0	0	0	2.05233	0	0	0	0	0	0	0	0	0	4.55696	9.94158	0	0	0	19.9461	0	0	0	0	0	0	0	0	0	28.7533	0	0	0	0	0	0	0	0	0	0	0	0	0
GNP164	0	0.00582	0	0	0	0.06106	0.45864	0	0	0	1.67475	0	0	0	0	0	0	0	0	0	4.12224	10.1188	0	0	0	20.1678	0	0	0	0	0	0	0	0	0	29.1206	0	0	0	0	0	0	0	0	0	0	0	0	0
GNP165	0	0.05723	0	0	0	0.16512	0.44492	0	0	0	3.37821	0	0	0	0	0	0	0	0	0	6.5474	15.9192	0	0	0	28.996	0	0	0	0	0	0	0	0	0	28.5639	0	0	0	0	0	0	0	0	0	0	0	0	0
GNP166	0	0.10476	0	0	0	0.2322	0.58114	0	0	0	4.47354	0	0	0	0	0	0	0	0	0	7.08016	14.2966	0	0	0	26.0999	0	0	0	0	0	0	0	0	0	28.1312	0	0	0	0	0	0	0	0	0	0	0	0	0
GNP167	0.13536	0.07566	0	0	0	0.6407	4.25908	0	0	0	7.63686	0	0	0	0	0	0	0	0	0	19.168	63.9728	0	0.1635	0	91.7619	0	0	0	0	0	0	0.17444	0	0	92.8037	0	0	0	0	0	0	0	0	0	0	0	0	0
GNP168	0.024	0.02813	0	0	0	1.0105	4.28848	0	0	0	14.5664	0	0	0	0	0	0	0	0	0	32.3426	117.323	0	0.16568	0	194.868	0	0	0	0	0	0	0.05782	0	0	215.714	0	0	0	0	0	0	0	0	0	0	0	0	0
GNP169	0	0.05238	0	0	0	0.23478	0.56546	0.05824	0.15552	0	3.74448	0	0.09804	0	0	0.1534	0	0	0	0	5.67492	23.6808	1.95615	25.0711	0	25.4822	0.46176	18.2781	0	0	11.5192	0	0	0	0	25.1921	0	0.32912	0	0	18.3463	0	0	0	0	0	9.48537	0	0
GNP170	0	0.12416	0	0	0	0.65704	4.61384	1.57456	2.60712	0	8.39637	0.1738	2.17968	0	0	2.40248	0	0	0	0	17.4124	103.31	12.874	81.4191	0	97.0604	3.35997	62.4105	0	0	46.8432	0	0	0	0	88.9499	0	1.90575	0	0	58.055	0	0	0	0	0	30.6117	0	0
GNP171	0	0.07081	0.10094	0.08453	0	0.68714	6.35922	2.23808	5.39892	0	15.4181	0.1749	4.17696	0	0	3.04912	0	0	0	0	29.6066	213.72	30.2904	191.55	0	217.225	7.99422	140.314	0	0	111.154	0	0.12642	0	0	216.732	0.17784	5.03602	0	0	128.507	0	0	0	0	0	72.0233	0	0
GNP172	0	0.10573	0	0	0	0.15652	1.00254	0	0.1404	0	3.15636	0	0	0	0	0.4779	0	0	0	0	6.54512	18.5001	0.59535	21.4545	0	29.4342	0	1.2903	0	0	31.3303	0	0	0	0	27.9764	0	0	0	0	0	0	0	0	0	0	13.9578	0	0
GNP173	0	0.00873	0	0.17976	0	0.70606	3.92882	0	4.1256	0	8.59734	0	0	0	0	4.80142	0	0	0	0	15.317	79.9524	1.29675	74.9789	0	102.928	0	3.795	0	0	99.4602	0	0	0	0	93.1325	0	0	0	0	0.10375	0	0	0	0	0	51.2994	0	0
GNP174	0.07104	0.13095	0	0	0	1.13692	5.83884	0	6.40764	0	14.4803	0	0	0	0	8.29186	0	0	0	0	31.5012	169.548	4.3743	173.496	0	224.672	0	8.0569	0	0	229.898	0	0.19012	0	0	222.742	0	0	0	0	0.7925	0	0	0	0	0	105.029	0	0.00216
GNP175	0	0	0	0	0	0.10836	0.49392	0	0	0	2.69961	0	0	0	0	0	0	0	0	0	5.09504	9.72477	0	0	0	19.279	0	0	0	0	0	0	0	0	0	22.8343	0	0	0	0	0	0	0	0	0	0	0	0	0
GNP176	0.06624	0	0	0	0	0.4429	3.27026	0	0	0	7.73865	0	0	0	0	0	0	0	0	0	16.9206	70.2524	0	0	0	98.2026	0	0	0	0	0	0	0	0	0	96.365	0	0	0	0	0	0	0	0	0	0	0	0	0
GNP177	0.07008	0.01552	0	0	0	0.72584	3.80632	0	0.00756	0	12.481	0	0	0	0	0	0	0.00679	0	0	28.0782	118.987	0	0.12753	0	191.524	0	0	0	0	0	0	0.10192	0	0	211.382	0	0	0	0	0	0	0	0	0	0	0	0	0
GNP178	0	0.05335	0	0	0	0.16856	0.46746	0	0	0	3.2451	0	0	0	0	0	0	0	0	0	6.45316	16.9191	0	0	0	28.8737	0	0	0	0	0	0	0	0	0	29.5149	0	0	0	0	0	0	0	0	0	0	0	0	0
GNP179	0	0.13386	0	0	0	0.3483	0.57918	0	0	0	4.55097	0	0	0	0	0	0	0	0	0	6.26012	13.6818	0	0	0	27.9946	0	0	0	0	0	0	0	0	0	30.5051	0	0	0	0	0	0	0	0	0	0	0	0	0
GNP180	0	0.11931	0	0	0	0.38614	0.45864	0	0	0	4.74324	0	0	0	0	0	0	0	0	0	6.40908	14.0699	0	0	0	27.9074	0	0	0	0	0	0	0	0	0	30.1809	0	0	0	0	0	0	0	0	0	0	0	0	0
GNP181	0	0.01455	0	0	0	0.36894	0.4949	0	0	0	4.26213	0	0	0	0	0	0	0	0	0	6.70396	13.1502	0	0	0	26.8347	0	0	0	0	0	0	0	0	0	29.4718	0	0	0	0	0	0	0	0	0	0	0	0	0
GNP182	0	0	0	0	0	0.21586	0.88102	0	0	0	5.05296	0	0	0	0	0	0	0	0	0	6.764	16.9676	0	0.03052	0	30.2887	0	0	0	0	0	0	0.00196	0	0	29.387	0	0	0	0	0	0	0	0	0	0	0	0	0
GNP183	0	0.1067	0	0	0	0.20038	0.55468	0	0	0	3.81147	0	0	0	0	0	0	0	0	0	7.23824	16.5627	0	0	0	28.2744	0	0	0	0	0	0	0	0	0	28.9936	0	0	0	0	0	0	0	0	0	0	0	0	0
GNP184	0	0.00679	0	0	0	0.21156	1.06134	0	0	0	3.78972	0	0	0	0	0	0	0	0	0	7.24432	18.2803	0	0	0	30.8537	0	0	0	0	0	0	0	0	0	28.9967	0	0	0	0	0	0	0	0	0	0	0	0	0
GNP185	0	0	0	0	0	0.22016	0.931	0	0	0	3.78363	0	0	0	0	0	0	0	0	0	6.631	19.5654	0	0.02943	0	30.2746	0	0	0	0	0	0	0	0	0	29.3678	0	0	0	0	0	0	0	0	0	0	0	0	0
GNP186	0	0.21825	0	0	0	0.14104	1.25244	0	0	0	4.05768	0	0	0	0	0	0	0	0	0	6.89548	17.1211	0	0	0	30.5571	0	0	0	0	0	0	0	0	0	27.536	0	0	0	0	0	0	0	0	0	0	0	0	0
GNP187	0	0.22601	0	0	0	0.14878	1.24166	0	0	0	4.29171	0	0	0	0	0	0	0	0	0	6.51928	17.5834	0	0	0	30.859	0	0	0	0	0	0	0	0	0	27.3974	0	0	0	0	0	0	0	0	0	0	0	0	0
GNP188	0	0	0	0	0	0.19264	1.14856	0	0	0	3.6627	0	0	0	0	0	0	0	0	0	6.29432	19.4188	0	0	0	28.8878	0	0	0	0	0	0	0	0	0	28.8327	0	0	0	0	0	0	0	0	0	0	0	0	0
GNP189	0	0.30652	0	0.04708	0	0.26058	6.2769	0.05512	3.17628	0	4.53618	0	0.06042	0	0	0.17228	0	0	0	0	6.13092	30.3455	1.91835	46.168	0	28.732	0	4.9151	0	0	16.9623	0	0	0	0	27.0609	0	0	0	0	0.49	0	0	0	0	0	1.23453	0	0
GNP190	0	0	0	0	0	0.20382	0.43316	0	0	0	4.17687	0	0	0	0	0	0	0	0	0	6.73892	15.4004	0	0	0	27.83	0	0	0	0	0	0	0	0	0	27.8594	0	0	0	0	0	0	0	0	0	0	0	0	0
GNP191	0	0.10088	0	0	0	0.2107	0.49294	0	0	0	3.89586	0	0	0	0	0	0	0	0	0	7.25192	15.2797	0	0	0	28.8631	0	0	0	0	0	0	0	0	0	27.4443	0	0	0	0	0	0	0	0	0	0	0	0	0
[truncated: 77 more columns]
